# Supplementary material for: Risk of benign paroxysmal positional vertigo in patients with depressive disorders: a nationwide population-based cohort study
Source: PubMed Central journal article supplement — BMJ Open. 2019 Mar 30;9(3):e026936. doi: 10.1136/bmjopen-2018-026936 (PMC6475146; doi:10.1136/bmjopen-2018-026936), 2019-03-30
Supplement: bmjopen-2018-026936.draft_revisions.pdf [file bmjopen-2018-026936.draft_revisions.pdf]

# BMJ Open

BMJ Open is committed to open peer review. As part of this commitment we make the peer review history of every article we publish publicly available.

When an article is published we post the peer reviewers' comments and the authors' responses online. We also post the versions of the paper that were used during peer review. These are the versions that the peer review comments apply to.

The versions of the paper that follow are the versions that were submitted during the peer review process. They are not the versions of record or the final published versions. They should not be cited or distributed as the published version of this manuscript.

BMJ Open is an open access journal and the full, final, typeset and author-corrected version of record of the manuscript is available on our site with no access controls, subscription charges or pay-per-view fees (<http://bmjopen.bmj.com>).

If you have any questions on BMJ Open's open peer review process please email [info.bmjopen@bmj.com](mailto:info.bmjopen@bmj.com)

# BMJ Open

## Risk of Benign Paroxysmal Positional Vertigo in Patients with Depressive Disorders: A Nationwide Population-Based Cohort Study

|                               |                                                                                                                                                                                                                                                                                                                                                                                                                                                                                                                                                                                                                                                                                                                                                                                                                                                                                                       |
|-------------------------------|-------------------------------------------------------------------------------------------------------------------------------------------------------------------------------------------------------------------------------------------------------------------------------------------------------------------------------------------------------------------------------------------------------------------------------------------------------------------------------------------------------------------------------------------------------------------------------------------------------------------------------------------------------------------------------------------------------------------------------------------------------------------------------------------------------------------------------------------------------------------------------------------------------|
| Journal:                      | <i>BMJ Open</i>                                                                                                                                                                                                                                                                                                                                                                                                                                                                                                                                                                                                                                                                                                                                                                                                                                                                                       |
| Manuscript ID                 | bmjopen-2018-026936                                                                                                                                                                                                                                                                                                                                                                                                                                                                                                                                                                                                                                                                                                                                                                                                                                                                                   |
| Article Type:                 | Research                                                                                                                                                                                                                                                                                                                                                                                                                                                                                                                                                                                                                                                                                                                                                                                                                                                                                              |
| Date Submitted by the Author: | 27-Sep-2018                                                                                                                                                                                                                                                                                                                                                                                                                                                                                                                                                                                                                                                                                                                                                                                                                                                                                           |
| Complete List of Authors:     | Hsu, Chiao-Lin; Kaohsiung Veterans General Hospital, Department of Health Management Center; Kaohsiung Veterans General Hospital, Center for Geriatrics and Gerontology<br>Tsai, Shih-Jen; Taipei Veterans General Hospital, Department of Psychiatry; National Yang-Ming University, Taipei, Taiwan, Division of Psychiatry, Faculty of Medicine<br>Shen, Cheng-Che; Taichung Veterans General Hospital Chiayi Branch, Department of Psychiatry; National Yang-Ming University, Division of Psychiatry, Faculty of Medicine<br>Lu, Ti; Kaohsiung Veterans General Hospital, Department of Psychiatry<br>Hung, Yao-Min; Kaohsiung Veterans General Hospital, Department of Emergency Medicine; National Yang-Ming University, School of Medicine<br>Hu, Li-Yu; Taipei Veterans General Hospital, Department of Psychiatry; National Yang-Ming University, Division of Psychiatry, Faculty of Medicine |
| Keywords:                     | depressive disorder, benign peripheral persistent vertigo, hyperthyroidism, risk factor, cohort study                                                                                                                                                                                                                                                                                                                                                                                                                                                                                                                                                                                                                                                                                                                                                                                                 |
|                               |                                                                                                                                                                                                                                                                                                                                                                                                                                                                                                                                                                                                                                                                                                                                                                                                                                                                                                       |

SCHOLARONE™  
Manuscripts

# Risk of Benign Paroxysmal Positional Vertigo in Patients with Depressive Disorders: A Nationwide Population-Based Cohort Study

Chiao-Lin Hsu<sup>1,2,3</sup>, Shih-Jen Tsai<sup>4,5</sup>, Cheng-Che Shen<sup>5,6,7</sup>, Ti Lu<sup>8</sup>, Yao-Min Hung<sup>9,10</sup>, Li-Yu Hu<sup>4,5\*</sup>

<sup>1</sup>Center for Health Examination, Kaohsiung Veterans General Hospital, Kaohsiung, Taiwan

<sup>2</sup>Department of Nursing, Meiho University, Pingtung, Taiwan; <sup>3</sup> Center for Geriatrics and

Gerontology, Kaohsiung Veterans General Hospital Kaohsiung, Taiwan; <sup>4</sup>Department of

Psychiatry, Taipei Veterans General Hospital, Taipei; <sup>5</sup>Division of Psychiatry, Faculty of

Medicine, National Yang-Ming University, Taipei, Taiwan; <sup>6</sup>Department of information

management, National Chung-Cheng University, Chiayi, Taiwan; <sup>7</sup>Department of

Psychiatry, Chiayi branch, Taichung Veterans General Hospital, Chiayi,

Taiwan; <sup>8</sup>Department of Psychiatry, Kaohsiung Veterans General Hospital, Kaohsiung,

Taiwan; <sup>9</sup>Department of Emergency Medicine, Kaohsiung Veterans General Hospital,

Kaohsiung, Taiwan; <sup>10</sup>School of Medicine, National Yang Ming University, Taipei, Taiwan

**\*Please correspondence to Li-Yu Hu M.D.**

Postal Address: No.201, Sec. 2, Shipai Rd., Beitou District, Taipei City, Taiwan 11217,

R.O.C

E-mail: [chrisuly@gmail.com](mailto:chrisuly@gmail.com)

Telephone number: +886-2-2875-7808

**Word count:** 2420

## Abstract

**Objective:** The association between depression and benign peripheral persistent vertigo (BPPV) remains debated. This study aimed to investigate the risk of BPPV in patients with depressive disorders.

**Design:** Longitudinal nationwide cohort study

**Setting:** National health insurance research database in Taiwan

**Participants:** We enrolled 10,297 patients diagnosed with depressive disorders between 2000 and 2009 and compared them to 41,188 selected control patients who had never been diagnosed with depressive disorders (at a 1:4 ratio matched by age, gender and index year) in relation to the risk of developing BPPV.

**Methods:** The follow-up period was defined as the time from the initial diagnosis of depressive disorders to the date of BPPV, censoring, or 31 December 2009. Cox proportional hazards regression analysis was used to investigate the risk of BPPV by sex, age and comorbidities, with hazard ratios (HRs) and 95% confidence intervals (CIs).

**Results:** During the 9-year follow-up period, 44 (0.59 per 1,000 person-years) patients with depressive disorders and 99 (0.33 per 1,000 person-years) control patients were diagnosed with BPPV. The incidence risk ratio of BPPV among both cohorts calculating from events of BPPV per 1,000 person-years of observation time was 1.79 (95% CI, 1.23–2.58,  $p = .002$ ). Following adjustments for age, sex, comorbidities, urbanization, and socioeconomic status, patients with depressive disorders were 1.57 times more likely to develop BPPV (95% CI, 1.09–2.26,  $p = .014$ ) as compared to control patients. In addition, hyperthyroidism (HR = 3.55, 95% CI, 1.58–7.98,  $p = .002$ ) was an independent risk factor for the development of new-onset BPPV in patients with depressive disorders.

**Conclusions:** Patients with depressive disorders may have an increased risk of developing BPPV, especially those who have hyperthyroidism.

**Keywords:** depressive disorders; benign peripheral persistent vertigo; hyperthyroidism; risk factor; cohort study

### Strengths and limitations of this study

1. The association between depression and benign peripheral persistent vertigo (BPPV) remains debated. This longitudinal population-based data was conducted to assess the risk of BPPV in patients with depressive disorders.
2. The NHIRD lacks detailed clinical data regarding severity and outcomes of BPPV
3. Results from our study may underestimate the current condition since only patients seeking medical service would be identified in the Registry of NHIRD.

## Introduction

Depressive disorders are common mood disorders occurring in all populations and the Global Burden of Disease 2017 had refereed depressive disorders as a leading cause of health burden across the globe.<sup>1</sup> Patients with depressive disorders have been reported with an increased risk of mortality and propose the classification of depressive disorders as life-threatening.<sup>2,3</sup> Furthermore, people with depressive disorders have been reported with many somatic symptoms and result in increased need for clinical services, associated economic costs,<sup>4,5</sup> and considerable loss in quality of life.<sup>6</sup>

Benign paroxysmal positional vertigo (BPPV) have been reported with a lifetime prevalence of 2.4%, is the most common type of peripheral vertigo. Which is characterized by brief spinning sensations, usually induced by a sudden change in head position with respect to gravity, with attacks generally lasting less than 1 minute.<sup>7</sup> The fundamental pathophysiology of BPPV is dislodged calcium carbonate crystals in the utricle of the inner ear entering the semicircular canals.<sup>8</sup> Old age<sup>7</sup> and several co-morbidities, such as hypertension, diabetes mellitus, hypercholesterolemia, cerebrovascular ischemia, and cervical spondylosis result in the degeneration of the posterior labyrinth and otoconia detachment, have been regarded as risk factors of BPPV.

Psychiatric disorders or emotional stress are frequently observed in patients suffering from vertigo.<sup>9,10</sup> The results of most studies have been reported the higher rate of coexistence of depression and vestibular disorders<sup>11-13</sup> will lead to a vicious circle and a serious influence on the quality of life<sup>14</sup> and peripheral vertigo may play an essential role in the pathophysiology of development of subsequent depressive disorder, most of these studies report contradictory or conflicting results. Furthermore, when specified to explore the association between depression and BPPV, only a relatively small-scaled case-control study

1  
2  
3 indicates that life stressors and related depressive disorder may be seen as a trigger of  
4  
5 vestibular dysfunction, that is, a potential precursor of BPPV.<sup>15</sup>  
6

7  
8 Therefore, considering the debates on the association between the depression and  
9  
10 BPPV and no large-scaled study have tried to investigate the issue, we designed a  
11  
12 nationwide retrospective cohort study to explore the association between depressive  
13  
14 disorder and the subsequent BPPV. In addition, independent risk factors for developing  
15  
16 BPPV among patients with depressive disorders were also investigated.  
17

## 18 **Materials and Methods**

### 19 *Data Sources*

20  
21  
22 Nearly 99% of Taiwan's population utilizes health care services as a consequence of the  
23  
24 National Health Insurance (NHI) Program Bold Legislative Act enacted in 1995.<sup>16</sup> The  
25  
26 program offers comprehensive medical care coverage regarding outpatient, inpatient,  
27  
28 emergency visits, and Chinese medicine to all residents of Taiwan. The NHI research  
29  
30 database (NHIRD) contains comprehensive information with regard to clinical practice,  
31  
32 including prescription details and diagnostic codes in the International Classification of  
33  
34 Diseases, Ninth revision, Clinical Modification (ICD-9-CM) format. The NHIRD is managed  
35  
36 by the National Health Research Institutes (NHRI) and privacy is maintained according to  
37  
38 directives from the Bureau of the NHI.<sup>17</sup> The data source for our study was obtained from the  
39  
40 Longitudinal Health Insurance Database 2005 (LHID2005), a dataset of the NHIRD.  
41  
42 LHID2005 contains the data of 1,000,000 beneficiaries which were sampled from January 1,  
43  
44 2005 to January 1, 2006, that is, collected from those who were available in the Registry of  
45  
46 the NHIRD in 2005. In addition, it is worth emphasizing that although the dataset was  
47  
48 collected from those available in 2005, the LHID20005 included all original claim data of  
49  
50 1,000,000 individuals from January 1, 1996 to December 31, 2009. Moreover, the NHRI  
51  
52  
53  
54  
55  
56  
57  
58  
59  
60

1  
2  
3 affirms that there are no statistical differences in the distributions of age, sex, or health care  
4 costs between the data in the LHID2005 and that of the NHIRD.<sup>17</sup>  
5  
6

#### 7 *Availability of Data and Materials section*

8  
9 The NHIRD is addressed in publicity by the NHRI and the use of NHIRD is only for  
10 research purposes. All applicants must obey the Computer-Processed Personal Data  
11 Protection Law<sup>18</sup> and relevant regulations of Bureau of National Health Insurance and NHRI.  
12  
13 Moreover, applicants and their supervisor were asking for signing agreements upon  
14 application submission. All applications are reviewed for approval of data delivered. Request  
15 for the dataset may be sent an e-mail to the NHRI at [nhird@nhri.org.tw](mailto:nhird@nhri.org.tw) or call at  
16 +886-037-246166 ext. 33603 for immediate service. Office Hour: Monday-Friday 8:00-17:30  
17 (UTC+8).  
18  
19

#### 20 *Study design and subjects*

21  
22 We utilized data from the LHID 2005 and conducted a retrospective cohort study using  
23 a dataset collected between January 1, 2000 and December 31, 2004. We enrolled patients  $\geq$   
24 20 years who were diagnosed with depressive disorders by a psychiatrist according to the  
25 ICD-9-CM depressive disorders diagnosis codes: 296.2X-296.3X, 300.4, and 311.X. We  
26 defined the date of enrolling an adult patient with depressive disorders as case cohort  
27 between 2000 and 2004 as enrolment date. For each patient with depressive disorders  
28 included in the final cohort, 4 age- and sex-matched control patients without depressive  
29 disorders were randomly selected on the same enrolment date from the LHID 2005. We  
30 excluded patients who were previously diagnosed with BPPV (ICD-9-CM code 386.11)  
31 before the enrollment date. For each patient with depressive disorders included in the final  
32 cohort, 4 age- and sex-matched control patients without depressive disorders were randomly  
33 selected from the LHID 2005. The primary clinical outcome assessed was only BPPV  
34 diagnosed by neurologists or otorhinolaryngologists. We excluded those who diagnosed  
35  
36  
37  
38  
39  
40  
41  
42  
43  
44  
45  
46  
47  
48  
49  
50  
51  
52  
53  
54  
55



1  
2  
3 with acoustic neuroma (ICD-9-CM code 225.1), Meniere's disease (ICD-9-CM code  
4 386.0X), vestibular neuritis (ICD-9-CM code 386.12), labyrinthitis (ICD-9-CM code  
5 386.3X), sudden hearing loss (ICD-9-CM code 388.2), and head injury (ICD-9-CM code  
6 310.2, 800.X, 804.X, 850.X–854.×, 870.X–873.X, 907.0, 907.1, 959 .0X, and V15.52)  
7  
8 during the follow-up period. The cohort including patients with and without depressive  
9 disorders was observed until the development of BPPV, death, withdrawal from the NHI  
10 system, or December 31, 2009.  
11  
12  
13  
14  
15  
16  
17

### 18 *Ethics Statement*

19  
20  
21 This study was approved by the Institutional Review Board of the Kaohsiung Veterans  
22 General Hospital (No.: VGHKS14-CT7-07). We could not obtain written consent from  
23 study patients as the NHI dataset consists of de-identified secondary data for research  
24 purposes. The IRB of Kaohsiung Veterans General Hospital issued a formal written waiver  
25 for the need for consent.  
26  
27  
28  
29  
30  
31  
32  
33  
34

### 35 *Statistical analyses*

36  
37 The incidence of newly diagnosed BPPV in patients with depressive disorders and  
38 controls during the observational period was calculated and stratified by sex and age ( $\geq 65$   
39 years or  $< 65$  years). Comparisons between continuous variables were conducted with the  
40 independent *t*-test. Chi-squared analysis was used to examine the association of two  
41 categorical characteristics between the depressive disorders and control cohort. A Cox  
42 proportional hazards model was used to evaluate confounding variables and whether  
43 depressive disorders increase the risk of developing BPPV. The confounding variables were  
44 age, sex, and common comorbidities including hypertension, diabetes mellitus, dyslipidemia,  
45 coronary artery disease, congestive heart failure, hyperthyroidism, hypothyroidism,  
46  
47  
48  
49  
50  
51  
52  
53  
54  
55  
56  
57  
58  
59  
60

1  
2  
3 cerebrovascular disease, and malignancy; urbanization; and monthly income (table 3).

4  
5 Another Cox proportional-hazards regression model was performed again to identify variables  
6  
7 that predicted BPPV in the patients with depressive disorders (table 4). The cumulative  
8  
9 incidences of BPPV were compared between depressive disorder and control cohorts using  
10  
11 Kaplan–Meier curves and stratified log rank test was applied to determine the differences in  
12  
13 the risk for BPPV in the cohort.  
14

## 15 **Results**

### 16 *Participant Selection*

17  
18 We analyzed 10,297 patients with depressive disorders and 41,188 control patients. The  
19  
20 majority of patients in the cohort were female (61%). The median age was 39 years  
21  
22 (interquartile range [IQR], 30–51 years), and the median follow-up period was 7.19 years  
23  
24 (IQR = 5.96–8.48 years) for patients with depressive disorders and 7.22 years (IQR =  
25  
26 6.00–8.51 years) for control patients (p=0 .002). Table 1 includes comparisons of  
27  
28 demographic, clinical variables, and socioeconomic data between the control and depressive  
29  
30 cohorts. In the depressive disorders group, the most common comorbidities were hypertension  
31  
32 (2,124 patients, 20.6%), diabetes mellitus (1,236 patients, 12.0%), and dyslipidemia  
33  
34 (1,541 patients, 14.5%). As compared to the controls, depressive disorders patients had  
35  
36 significantly more physical comorbidities. Besides, depressive disorders patients had a  
37  
38 significantly higher prevalence in low-income populations (50.4% vs. 44.4%, p<0.001) and in  
39  
40 urban areas (64.1% vs. 60.9%, p< 0.001) as compared to non-depressive disorders patients  
41  
42  
43  
44

### 45 *Incidence Rate of BPPV*

46  
47 During the follow-up period, 44 patients (0.59 per 1,000 person-years) were diagnosed  
48  
49 with BPPV in the depressive disorders group, and 99 patients (0.33 per 1,000 person-years)  
50  
51 were diagnosed with BPPV in the control group. The incidence risk ratio (IRR) of BPPV  
52  
53 between depressive disorders and control patients was 1.79 (95% CI [confidence interval],  
54  
55

1  
2  
3 1.23–2.58,  $p=0.002$ ). When stratified by sex and age, the IRR of BPPV remained higher in the  
4 depressive disorders than in the control patients. The results are shown in Table 2.  
5

### 6 ***Risks of Newly Diagnosed BPPV among the Patients with and without Depressive***

#### 7 ***Disorders***

8  
9  
10  
11 After adjusting for age, sex, comorbidities, urbanization, and monthly income, there  
12 was a higher risk of developing BPPV in patients with depressive disorders than in the  
13 control patients (HR = 1.57, 95% CI, 1.09–2.26,  $p=0.014$ ). Results are summarized in Table  
14  
15  
16  
17  
18  
19  
20  
21  
22  
23  
24  
25  
26  
27  
28  
29  
30  
31  
32  
33  
34  
35  
36  
37  
38  
39  
40  
41  
42  
43  
44  
45  
46  
47  
48  
49  
50  
51  
52  
53  
54  
55  
56  
57  
58  
59  
60

#### 3 ***Risks Factors for BPPV in patients with Depressive Disorders***

As shown in Table 4, we predicted the development of BPPV in the depressive disorder  
cohorts by applying univariate analysis. Univariate logistic regression demonstrated that  
dyslipidemia (HR = 1.97, 95% CI, 0.99–3.89,  $p=0.053$ ), hyperthyroidism (HR = 3.74, 95% CI,  
1.67–8.38,  $p<0.001$ ), and cerebrovascular disease (HR = 2.31, 95% CI, 0.91–5.85,  $p=0.079$ )  
were possible prognostic factors. Multivariate analysis indicated that only hyperthyroidism  
(HR = 3.55, 95% CI, 1.58–7.98,  $p=0.002$ ) was an independent risk factor for patients with  
depressive disorders. All tables were placed at the end of the document text file.

## 4 **Discussion**

The two major findings in our study are as the following. First, patients with  
depressive disorders presented a 1.57 -fold greater risk of subsequently developing BPPV  
than did the general population by utilizing a nationwide population-based cohort study.  
Secondly, only hyperthyroidism (HR = 3.55, 95% CI, 1.58–7.98,  $p=0.002$ ) was an  
independent risk factor to develop BPPV among patients with depressive disorders.

The strength of this study is using a nationwide population-based data to evaluate  
BPPV risk in patients with depressive disorders. Advantages of using our NHIRD in  
medical research have been previously described,<sup>19</sup> which include enormous sample size,

1  
2  
3 lack of selection and participation bias and long-term comprehensive follow up. Whereas  
4 the results of most studies demonstrated the correlation between BPPV and following  
5 depressive disorders,<sup>20 21</sup> to the best of our knowledge, this is the first study implying that  
6 patients with depressive disorders have higher risk of developing BPPV.  
7  
8  
9

10  
11  
12  
13  
14  
15  
16  
17  
18  
19  
20  
21  
22  
23  
24  
25  
26  
27  
28  
29  
30  
31  
32  
33  
34  
35  
36  
37  
38  
39  
40  
41  
42  
43  
44  
45  
46  
47  
48  
49  
50  
51  
52  
53  
54  
55  
56  
57  
58  
59  
60  
Though depressive disorder have been reported to produce somatic symptoms including symptoms like BPPV,<sup>22</sup> one research indicated that patients with unrecognized BPPV were more likely to have depressive disorder.<sup>23</sup> Another study pointed out that depressive disorders may be an early presentation of neural circuitry alterations involving connections between the vestibular system and anatomical area such as hippocampus, amygdala, and infralimbic cortex.<sup>24</sup> One Asian literature showed that depression symptoms may adversely affect BPPV recurrence.<sup>25</sup> Though there was no strong evidence consistent with our findings, evidence mentioned above may indirectly prove our hypothesis.

The pathophysiology of depressive disorders and subsequent BPPV is unknown. There are several proposed mechanisms to explain this association. First, dysregulation of oxidative and inflammatory processes in depressive disorders may result in subsequent BPPV development. Numerous studies have demonstrated patients with depressive disorders have excessive oxidative stress and elevation in inflammatory responses.<sup>26-29</sup> Evidence supports a role for oxidative stress in otolith dysfunction leading to an increased risk of developing canalolithiasis, an essential step in the pathogenesis of BPPV.<sup>30-33</sup> Additional studies conclude depressive disorders associated with oxidative stress result in vestibular hair cells and neuronal damage in the inner ear,<sup>34</sup> which contributes to vestibular dysfunction and subsequent BPPV development.<sup>35 36</sup> Second, depressive disorders may induce abnormalities of the hypothalamus-pituitary-adrenal axis, which may hinder the inner ear blood flow and influence inner ear fluid balance. These abnormalities lead to dysfunction of the otoconial homeostasis,<sup>15 37</sup> an established risk factor for development of

1  
2  
3 BPPV.<sup>38</sup> Therefore, alterations to the neuroendocrine system may be the link between  
4 depressive disorders and the development of BPPV. Third, BPPV development in  
5 depressive disorders may be induced by serotonin dysfunction. The vestibular nucleus  
6 complex is composed of a large number of serotonin receptors, and lack of serotonin may  
7 result in a substantial impact on the electrophysiological activity of neurons, and  
8 dysfunction of the vestibular nucleus complex.<sup>39</sup> Previous studies have hypothesized a role  
9 for vestibular nucleus damage in the pathogenesis of BPPV development.<sup>36 40</sup> Finally, the  
10 dysregulation of the immune system, frequently observed in depressive disorders,<sup>41 42</sup> has  
11 proved to be an essential part of BPPV pathogenesis. Stone and Francis<sup>43</sup> suggest BPPV  
12 could develop by immune system's direct attack or indirect attack, resulting in debris within  
13 the inner ears. This explanation could be confirmed by the association of several  
14 autoimmune diseases, such as systemic sclerosis,<sup>44</sup> systemic lupus erythematosus, ulcerative  
15 colitis, Sjogren's syndrome, rheumatoid arthritis,<sup>43</sup> and chronic inflammatory demyelinating  
16 polyneuropathy<sup>45</sup> in the development of BPPV.

17  
18 We conclude patients with depressive disorders are more likely to develop BPPV if they  
19 are afflicted with hyperthyroidism. Mechanical movements of thyroid autoantibodies in the  
20 inner ear fluid or the development of autoimmune microangiitis in the labyrinth can result in  
21 BPPV in the presence of hyperthyroidism or hypothyroidism.<sup>46</sup> Other studies support a role  
22 for thyroid hormone fluctuations<sup>47</sup> and circulating anti-thyroid autoantibodies<sup>48</sup> related to  
23 vestibular dysfunction in subsequent BPPV development. Therefore, dysregulation of the  
24 immune system may play a vital role between hyperthyroidism and BPPV as documented  
25 by our study.

26  
27 There are several limitations in this study. The first limitation relates to the lack of  
28 detailed information regarding tobacco use, alcohol consumption, head position in bed, and  
29 family history of BPPV in patient data collected from the NHIRD, factors which may

1  
2  
3 influence risk of BPPV development.<sup>49-51</sup> Thus, we were unable to control for these  
4  
5 potentially confounding factors. Second, the NHIRD is an administrative database, which  
6  
7 lacks detailed clinical data regarding severity and outcomes of BPPV patients, which  
8  
9 interferes with analysis of BPPV prognoses in the cohort. Third, in the claims-based study  
10  
11 design, only patients seeking medical service would be identified in the Registry of NHIRD  
12  
13 and these identification issues may underestimate the results.  
14

15  
16 Since profound health burden and extensive health care utilization may be influential  
17  
18 with BPPV development.<sup>52-53</sup> Our findings and findings in other literature raised our  
19  
20 attention to unrecognized BPPV and inappropriate treatment among patients with  
21  
22 depressive disorders may lead to disabling and related poor quality of life.  
23

## 24 **Conclusions**

25  
26 In the population-based retrospective study, we found that patients with depressive  
27  
28 disorders have statistically higher risk of developing BPPV. Furthermore, hyperthyroidism  
29  
30 was identified an independent risk factor to develop BPPV for patients with depressive  
31  
32 disorders. Future studies are required to clarify the underlying biological mechanisms of these  
33  
34 associations. Clinicians are encouraged to provide appropriate medical care for those who  
35  
36 diagnosed with BPPV and preexisting depressive disorder. Monitoring and management  
37  
38 depressive symptoms for the high-risk patients are also warranted.  
39  
40

## 41 **List of abbreviations:**

42  
43 BPPV, benign paroxysmal positional vertigo; NHI, National Health Insurance; LHID  
44  
45 2005, Longitudinal Health Insurance Database 2005; NHIRD, National Health Insurance  
46  
47 Research Database; ICD-9-CM, the International Classification of Diseases, ninth revision,  
48  
49 Clinical Modification; IRRs, incidence rate ratios; HR, hazard ratio; aHR, adjusted hazard  
50  
51 ratio; CI, confidence interval.  
52  
53

## 54 **Acknowledgments**

1  
2  
3 The authors would like to thank Cheng-Che Shen and Shih-Jen Tsai for perceptive  
4  
5 comments and fruitful discussion on the manuscript.  
6

### 7 **Authors Contributions**

8  
9 Chiao-Lin Hsu and Li-Yu, Hu wrote the manuscript. Cheng-Che Shen and Ti, Lu helped  
10  
11 with study design and data collection. Cheng-Che Shen, Shih-Jen Tsai and Yao-Min Hung  
12  
13 contributed to the revision of the manuscript. All authors read and approved the final  
14  
15 manuscript.  
16

### 17 **Competing interests**

18  
19 The authors declare that they have no conflict of interest.  
20  
21

### 22 **Funding**

23  
24 This work was supported by grant NSC 101-2314-B-075-040 from the National  
25  
26 Science Council, Taiwan, and grant V103C-048 from the Taipei Veterans General Hospital.  
27  
28 The funding sources had no role in the study design or conduct, or in the decision to submit  
29  
30 for publication.  
31  
32  
33  
34  
35  
36  
37  
38  
39  
40  
41  
42  
43  
44  
45  
46  
47  
48  
49  
50  
51  
52  
53  
54

## References

1. Organization WH. Depression and Other Common Mental Disorders: Global Health Estimates. Geneva: World Health Organization. 2017:1-22.
2. Cuijpers P, Smit F. Excess mortality in depression: a meta-analysis of community studies. *Journal of affective disorders* 2002;72:227-36.
3. Kozela M, Bobak M, Besala A, et al. The association of depressive symptoms with cardiovascular and all-cause mortality in Central and Eastern Europe: Prospective results of the HAPIEE study. *European journal of preventive cardiology* 2016;23:1839-47.
4. Berto P, D'Ilario D, Ruffo P, et al. Depression: cost-of-illness studies in the international literature, a review. *The journal of mental health policy and economics* 2000;3:3-10.
5. Greenberg PE, Birnbaum HG. The economic burden of depression in the US: societal and patient perspectives. *Expert opinion on pharmacotherapy* 2005;6:369-76.
6. Jia H, Zack MM, Thompson WW, et al. Impact of depression on quality-adjusted life expectancy (QALE) directly as well as indirectly through suicide. *Social psychiatry and psychiatric epidemiology* 2015;50:939-49.
7. Kim JS, Zee DS. Clinical practice. Benign paroxysmal positional vertigo. *N Engl J Med* 2014;370:1138-47.
8. Fife TD, von Brevern M. Benign Paroxysmal Positional Vertigo in the Acute Care Setting. *Neurologic clinics* 2015;33:601-17.
9. Ketola S, Havia M, Appelberg B, et al. Psychiatric symptoms in vertiginous patients. *Nord J Psychiatry* 2015;69:287-91.
10. Soderman AC, Moller J, Bagger-Sjoberg D, et al. Stress as a trigger of attacks in Meniere's disease. A case-crossover study. *The Laryngoscope* 2004;114:1843-8.
11. Monzani D, Casolari L, Guidetti G, et al. Psychological distress and disability in patients with vertigo. *Journal of psychosomatic research* 2001;50:319-23.
12. Chen ZJ, Chang CH, Hu LY, et al. Increased risk of benign paroxysmal positional vertigo in patients with anxiety disorders: a nationwide population-based retrospective cohort study. *BMC psychiatry* 2016;16:238.
13. Yuan Q, Yu L, Shi D, et al. Anxiety and depression among patients with different types of vestibular peripheral vertigo. *Medicine (Baltimore)* 2015;94:e453.
14. Best C, Eckhardt-Henn A, Tschan R, et al. Psychiatric morbidity and comorbidity in different vestibular vertigo syndromes. Results of a prospective longitudinal study over one year. *Journal of neurology* 2009;256:58-65.



- 1  
2  
3 15. Monzani D, Genovese E, Rovatti V, et al. Life events and benign paroxysmal positional  
4 vertigo: a case-controlled study. *Acta Otolaryngol* 2006;126:987-92.  
5  
6 16. Cheng TM. Taiwan's new national health insurance program: genesis and experience so  
7 far. *Health Aff (Millwood)* 2003;22:61-76.  
8  
9 17. Database. NHIR National Health Research Institutes. [Available from:  
10 <http://nhird.nhri.org.tw/en/>.  
11  
12 18. Lawrence Ong KC. Data Protection 2018 Taiwan Taiwan2018 [updated 12/06/2018; cited  
13 2018. Available from:  
14 <https://iclg.com/practice-areas/data-protection-laws-and-regulations/taiwan> accessed  
15 12/06/2018 2018.  
16  
17 19. Hsing AW, Ioannidis JP. Nationwide Population Science: Lessons From the Taiwan  
18 National Health Insurance Research Database. *JAMA internal medicine* 2015;175:1527-9.  
19  
20 20. Hagr A. Comorbid psychiatric conditions of benign paroxysmal positional vertigo. *Int J*  
21 *Health Sci (Qassim)* 2009;3:23-8.  
22  
23 21. Eckhardt-Henn A, Best C, Bense S, et al. Psychiatric comorbidity in different organic  
24 vertigo syndromes. *Journal of neurology* 2008;255:420-8.  
25  
26 22. Ferrari S, Monzani D, Baraldi S, et al. Vertigo "in the pink": The impact of female gender  
27 on psychiatric-psychosomatic comorbidity in benign paroxysmal positional vertigo patients.  
28 *Psychosomatics* 2014;55:280-8.  
29  
30 23. Van der Zaag-Loonen HJ, van Leeuwen RB, Brintjes TD, et al. Prevalence of  
31 unrecognized benign paroxysmal positional vertigo in older patients. *European archives of*  
32 *oto-rhino-laryngology : official journal of the European Federation of*  
33 *Oto-Rhino-Laryngological Societies (EUFOS):affiliated with the German Society for*  
34 *Oto-Rhino-Laryngology - Head and Neck Surgery* 2015;272:1521-4.  
35  
36 24. Gurvich C, Maller JJ, Lithgow B, et al. Vestibular insights into cognition and psychiatry.  
37 *Brain research* 2013;1537:244-59.  
38  
39 25. Wei W, Sayyid ZN, Ma X, et al. Presence of Anxiety and Depression Symptoms Affects  
40 the First Time Treatment Efficacy and Recurrence of Benign Paroxysmal Positional Vertigo.  
41 *Frontiers in neurology* 2018;9:178.  
42  
43 26. Sarandol A, Sarandol E, Eker SS, et al. Major depressive disorder is accompanied with  
44 oxidative stress: short-term antidepressant treatment does not alter oxidative-antioxidative  
45 systems. *Human psychopharmacology* 2007;22:67-73.  
46  
47 27. Cudney LE, Sassi RB, Behr GA, et al. Alterations in circadian rhythms are associated with  
48 increased lipid peroxidation in females with bipolar disorder. *The international journal of*  
49 *neuropsychopharmacology / official scientific journal of the Collegium Internationale*  
50 *Neuropsychopharmacologicum (CINP)* 2014;17:715-22.  
51  
52  
53  
54

- 1  
2  
3 28. Szuster-Ciesielska A, Slotwinska M, Stachura A, et al. Accelerated apoptosis of blood  
4 leukocytes and oxidative stress in blood of patients with major depression. *Progress in*  
5 *neuro-psychopharmacology & biological psychiatry* 2008;32:686-94.  
6  
7 29. Widner B, Fuchs D, Leblhuber F, et al. Does disturbed homocysteine and folate  
8 metabolism in depression result from enhanced oxidative stress? *Journal of neurology,*  
9 *neurosurgery, and psychiatry* 2001;70:419.  
10  
11 30. Tsai KL, Cheng YY, Leu HB, et al. Investigating the role of Sirt1-modulated oxidative  
12 stress in relation to benign paroxysmal positional vertigo and Parkinson's disease.  
13 *Neurobiology of aging* 2015;36:2607-16.  
14  
15 31. Kaya H, Gokdemir MT, Sogut O, et al. Evaluation of oxidative status and trace elements  
16 in patients with benign paroxysmal positional vertigo. *HealthMed* 2013;7:72-9.  
17  
18 32. Goto F, Hayashi K, Kunihiro T, et al. The possible contribution of angiitis to the onset of  
19 benign paroxysmal positional vertigo (BPPV). *The international tinnitus journal*  
20 2010;16:25-8.  
21  
22 33. Fujita N, Yamanaka T, Okamoto H, et al. Horizontal canal benign paroxysmal positional  
23 vertigo--its affected side and horizontal semicircular canal function. *Nihon Jibiinkoka Gakkai*  
24 *kaiho* 2005;108:202-6.  
25  
26 34. Iwasaki S, Yamasoba T. Dizziness and Imbalance in the Elderly: Age-related Decline in  
27 the Vestibular System. *Aging Dis* 2015;6:38-47.  
28  
29 35. Xu Z, Zhao P, Yang X, et al. The hearing and vestibular evoked myogenic potentials test  
30 in patients with primary benign paroxysmal positional vertigo. *Lin chuang er bi yan hou tou*  
31 *jing wai ke za zhi = Journal of clinical otorhinolaryngology, head, and neck surgery*  
32 2015;29:20-3.  
33  
34 36. Frohman EM, Kramer PD, Dewey RB, et al. Benign paroxysmal positioning vertigo in  
35 multiple sclerosis: diagnosis, pathophysiology and therapeutic techniques. *Multiple sclerosis*  
36 *(Houndmills, Basingstoke, England)* 2003;9:250-5.  
37  
38 37. Horner KC, Cazals Y. Stress in hearing and balance in Meniere's disease. *Noise & health*  
39 2003;5:29-34.  
40  
41 38. Fuchs E, Flugge G. Chronic social stress: effects on limbic brain structures. *Physiol Behav*  
42 2003;79:417-27.  
43  
44 39. Smith PF, Darlington CL. A possible explanation for dizziness following SSRI  
45 discontinuation. *Acta Otolaryngol* 2010;130:981-3.  
46  
47 40. Fetter M. Vestibulo-ocular reflex. *Developments in ophthalmology* 2007;40:35-51.  
48  
49  
50  
51  
52  
53  
54  
55  
56  
57  
58  
59  
60

- 1  
2  
3 41. ChiriTa AL, Gheorman V, Bondari D, et al. Current understanding of the neurobiology of  
4 major depressive disorder. *Romanian journal of morphology and embryology = Revue*  
5 *roumaine de morphologie et embryologie* 2015;56:651-8.  
6  
7 42. Hodes GE, Kana V, Menard C. Neuroimmune mechanisms of depression.  
8 2015;18:1386-93.  
9  
10 43. Stone JH, Francis HW. Immune-mediated inner ear disease. *Current opinion in*  
11 *rheumatology* 2000;12:32-40.  
12  
13 44. Thombs BD, Jewett LR, Kwakkenbos L, et al. Major depression diagnoses among patients  
14 with systemic sclerosis: baseline and one-month followup. *Arthritis care & research*  
15 2015;67:411-6.  
16  
17 45. Frohman EM, Tusa R, Mark AS, et al. Vestibular dysfunction in chronic inflammatory  
18 demyelinating polyneuropathy. *Annals of neurology* 1996;39:529-35.  
19  
20 46. Papi G, Guidetti G, Corsello SM, et al. The association between benign paroxysmal  
21 positional vertigo and autoimmune chronic thyroiditis is not related to thyroid status. *Thyroid*  
22 2010;20:237-8.  
23  
24 47. Lautermann J, ten Cate W-JF. Postnatal expression of the  $\alpha$ -thyroid hormone receptor in  
25 the rat cochlea. *Hearing Research* 1997;107:23-8.  
26  
27 48. Chiarella G, Tognini S, Nacci A, et al. Vestibular disorders in euthyroid patients with  
28 Hashimoto's thyroiditis: role of thyroid autoimmunity. *Clinical endocrinology* 2014;81:600-5.  
29  
30 49. Sunami K, Tochino R, Tokuhara Y, et al. Effects of cigarettes and alcohol consumption in  
31 benign paroxysmal positioning vertigo. *Acta Otolaryngol* 2006;126:834-8.  
32  
33 50. Lopez-Escamez JA, Gamiz MJ, Finana MG, et al. Position in bed is associated with left or  
34 right location in benign paroxysmal positional vertigo of the posterior semicircular canal.  
35 *American journal of otolaryngology* 2002;23:263-6.  
36  
37 51. Gizzi M, Ayyagari S, Khattar V. The familial incidence of benign paroxysmal positional  
38 vertigo. *Acta Otolaryngol* 1998;118:774-7.  
39  
40 52. Grill E, Penger M, Kentala E. Health care utilization, prognosis and outcomes of  
41 vestibular disease in primary care settings: systematic review. *Journal of neurology* 2016;263  
42 Suppl 1:S36-44.  
43  
44 53. Mueller M, Strobl R, Jahn K, et al. Burden of disability attributable to vertigo and  
45 dizziness in the aged: results from the KORA-Age study. *European journal of public health*  
46 2014;24:802-7.  
47  
48  
49  
50  
51  
52  
53  
54  
55  
56  
57  
58  
59  
60

**Table 1 Baseline Characteristics of Patients with and without Depressive Disorders**

| Demographic data         | Patients with Depressive Disorders |      | Patients without Depressive Disorders |      | <i>P</i> value |
|--------------------------|------------------------------------|------|---------------------------------------|------|----------------|
|                          | <i>n</i>                           | %    | <i>n</i>                              | %    |                |
| Age (years) <sup>a</sup> | 39 (30–51)                         |      | 39 (30–51)                            |      |                |
| ≥65                      | 1,036                              | 10.1 | 4,143                                 | 10.1 | .999           |
| <65                      | 9,261                              | 89.9 | 37,045                                | 89.9 |                |
| Sex                      |                                    |      |                                       |      |                |
| Male                     | 4,012                              | 39.0 | 16,048                                | 39.0 | 1.000          |
| Female                   | 6,285                              | 61.0 | 25,140                                | 61.0 |                |
| Comorbidities            |                                    |      |                                       |      |                |
| Hypertension             | 2,124                              | 20.6 | 5,444                                 | 13.2 | <.001          |
| Diabetes mellitus        | 1,236                              | 12.0 | 3,112                                 | 7.5  | <.001          |
| Dyslipidemia             | 1,541                              | 14.5 | 3,829                                 | 9.3  | <.001          |
| Coronary artery disease  | 87                                 | 0.8  | 235                                   | 0.6  | .002           |
| Congestive heart failure | 272                                | 2.6  | 563                                   | 1.4  | <.001          |
| Hyperthyroidism          | 511                                | 5.0  | 727                                   | 1.8  | <.001          |
| Hypothyroidism           | 116                                | 1.1  | 193                                   | 0.5  | <.001          |
| Cerebrovascular disease  | 573                                | 5.6  | 1,106                                 | 2.7  | <.001          |
| Malignant neoplasms      | 181                                | 1.8  | 415                                   | 1.0  | <.001          |
| Degree of urbanization   |                                    |      |                                       |      |                |

|    |                              |                  |      |                  |      |       |
|----|------------------------------|------------------|------|------------------|------|-------|
| 1  |                              |                  |      |                  |      |       |
| 2  |                              |                  |      |                  |      |       |
| 3  | Urban                        | 6,599            | 64.1 | 25,196           | 60.9 | <.001 |
| 4  |                              |                  |      |                  |      |       |
| 5  | Suburban                     | 2,680            | 26.0 | 12,172           | 29.4 |       |
| 6  |                              |                  |      |                  |      |       |
| 7  | Rural                        | 817              | 7.9  | 3,205            | 7.8  |       |
| 8  |                              |                  |      |                  |      |       |
| 9  |                              |                  |      |                  |      |       |
| 10 | Income group                 |                  |      |                  |      |       |
| 11 |                              |                  |      |                  |      |       |
| 12 | Low income                   | 5,189            | 50.4 | 18,340           | 44.4 | <.001 |
| 13 |                              |                  |      |                  |      |       |
| 14 | Medium income                | 3,819            | 37.1 | 16,426           | 39.7 |       |
| 15 |                              |                  |      |                  |      |       |
| 16 | High income                  | 1,289            | 12.5 | 6,422            | 15.5 |       |
| 17 |                              |                  |      |                  |      |       |
| 18 | Follow-up years <sup>a</sup> | 7.19 (5.96–8.48) |      | 7.22 (6.00–8.51) |      | .002  |
| 19 |                              |                  |      |                  |      |       |

<sup>a</sup>Median (interquartile range)

**Table 2 Person-Time Incidence of Benign Paroxysmal Positional Vertigo in Patients with and without Depressive Disorders**

|        | Patients with Depressive Disorders |                        | Patients without Depressive Disorders |                        | Risk ratio (95% CI) | P value |
|--------|------------------------------------|------------------------|---------------------------------------|------------------------|---------------------|---------|
|        | No. of BPPV                        | Per 1,000 person-years | No. of BPPV                           | Per 1,000 person-years |                     |         |
| Total  | 44                                 | 0.59                   | 99                                    | 0.33                   | 1.79 (1.23–2.58)    | .002    |
| Age    |                                    |                        |                                       |                        |                     |         |
| ≥65    | 7                                  | 0.98                   | 15                                    | 0.51                   | 1.90 (0.66–4.95)    | .153    |
| <65    | 37                                 | 0.55                   | 84                                    | 0.31                   | 1.77 (1.17–2.64)    | .003    |
| Sex    |                                    |                        |                                       |                        |                     |         |
| Male   | 16                                 | 0.56                   | 31                                    | 0.27                   | 2.08 (1.16–3.76)    | .023    |
| Female | 28                                 | 0.62                   | 68                                    | 0.37                   | 1.66 (1.07–2.56)    | .030    |

CI, confidence interval

**Table 3 Analyses of Risk Factors for Benign Paroxysmal Positional Vertigo in Patients with and without Depressive Disorders**

| Predictive variables              | Univariate analysis |                | Multivariate analysis |                |
|-----------------------------------|---------------------|----------------|-----------------------|----------------|
|                                   | HR (95% CI)         | <i>P</i> value | HR (95% CI)           | <i>P</i> value |
| Depressive Disorders              | 1.79 (1.26–2.56)    | <.001          | 1.57 (1.09–2.26)      | .014           |
| Age ( $\geq 65 = 1$ , $<65 = 0$ ) | 1.69 (1.07–2.66)    | .002           | 1.20 (0.71–2.02)      | .503           |
| Sex (Female = 1, Male = 0)        | 1.29 (0.91–1.82)    | .158           |                       |                |
| Comorbidities                     |                     |                |                       |                |
| Hypertension                      | 1.91 (1.30–2.81)    | <.001          | 1.23 (0.76–2.00)      | .401           |
| Diabetes mellitus                 | 1.36 (0.80–2.32)    | .261           |                       |                |
| Dyslipidemia                      | 2.15 (1.42–3.27)    | <.001          | 1.70 (1.05–2.76)      | .032           |
| Coronary artery disease           | 5.06 (1.87–13.67)   | <.001          | 3.00 (1.05–8.61)      | .041           |
| Congestive heart failure          | 1.95 (0.72–5.27)    | .188           |                       |                |
| Hyperthyroidism                   | 2.90 (1.48–5.70)    | .002           | 2.52 (1.26–5.03)      | .009           |
| Hypothyroidism                    | 1.26 (0.18–9.02)    | .817           |                       |                |
| Cerebrovascular disease           | 3.23 (1.83–5.71)    | <.001          | 2.19 (1.17–4.11)      | .014           |
| Malignant neoplasms               | 2.09 (0.67–6.55)    | .207           |                       |                |
| Degree of urbanization            |                     |                |                       |                |
| Urban                             | Reference           |                | Reference             |                |
| Suburban                          | 1.10 (0.77–1.57)    | .606           | 1.10 (0.77–1.56)      | .618           |
| Rural                             | 4.38 (0.18–1.08)    | .072           | 0.39 (0.16–0.97)      | .043           |
| Income group                      |                     |                |                       |                |
| Low income                        | Reference           |                |                       |                |
| Medium income                     | 0.98 (0.69–1.38)    | .886           |                       |                |
| High income                       | 0.65 (0.37–1.14)    | .133           |                       |                |

1  
2  
3 HR, hazard ratio; CI, confidence interval  
4  
5  
6  
7  
8  
9  
10  
11  
12  
13  
14  
15  
16  
17  
18  
19  
20  
21  
22  
23  
24  
25  
26  
27  
28  
29  
30  
31  
32  
33  
34  
35  
36  
37  
38  
39  
40  
41  
42  
43  
44  
45  
46  
47  
48  
49  
50  
51  
52  
53  
54  
55  
56  
57  
58  
59  
60

For peer review only



**Table 4 Analyses of Risk Factors for Benign Paroxysmal Positional Vertigo in Patients with Depressive Disorders**

| Predictive variables               | Univariate analysis |                | Multivariate analysis |                |
|------------------------------------|---------------------|----------------|-----------------------|----------------|
|                                    | HR (95% CI)         | <i>P</i> value | HR (95% CI)           | <i>P</i> value |
| Age ( $\geq 65 = 1$ , $< 65 = 0$ ) | 1.75 (0.78–3.93)    | .174           |                       |                |
| Sex (Female = 1, Male = 0)         | 1.10 (0.60–2.04)    | .752           |                       |                |
| <b>Comorbidities</b>               |                     |                |                       |                |
| Hypertension                       | 0.88 (0.41–1.90)    | .747           |                       |                |
| Diabetes mellitus                  | 0.98 (0.39–2.49)    | .969           |                       |                |
| Dyslipidemia                       | 1.97 (0.99–3.89)    | .053           | 1.72 (0.86–3.46)      | .127           |
| Coronary artery disease            | 2.93 (0.40–21.26)   | .288           |                       |                |
| Congestive heart failure           | 0.92 (0.13–6.68)    | .935           |                       |                |
| Hyperthyroidism                    | 3.74 (1.67–8.38)    | <.001          | 3.55 (1.58–7.98)      | .002           |
| Hypothyroidism                     | 2.17 (0.30–15.75)   | .444           |                       |                |
| Cerebrovascular disease            | 2.31 (0.91–5.85)    | .079           | 1.99 (0.77–5.15)      | .154           |
| Malignant neoplasms                | 2.90 (0.70–11.97)   | .142           |                       |                |
| <b>Degree of urbanization</b>      |                     |                |                       |                |
| Urban                              | Reference           |                |                       |                |
| Suburban                           | 1.53 (0.82–2.86)    | .180           |                       |                |
| Rural                              | 0.31 (0.04–2.28)    | .249           |                       |                |
| <b>Income group</b>                |                     |                |                       |                |
| Low income                         | Reference           |                |                       |                |
| Medium income                      | 1.33 (0.71–2.52)    | .377           |                       |                |
| High income                        | 1.24 (0.50–3.11)    | .644           |                       |                |

HR, hazard ratio; CI, confidence interval

1  
2  
3 **Figure legend.**  
4

5 Cumulative incidence of benign paroxysmal positional vertigo in patients with and without  
6 depressive disorders. The cumulative incidence of BPPV in patients with depressive disorders  
7 was significantly higher than that in the matched cohort. (log-rank test,  $p < 0.001$ )  
8  
9  
10  
11  
12  
13  
14  
15  
16  
17  
18  
19  
20  
21  
22  
23  
24  
25  
26  
27  
28  
29  
30  
31  
32  
33  
34  
35  
36  
37  
38  
39  
40  
41  
42  
43  
44  
45  
46  
47  
48  
49  
50  
51  
52  
53  
54  
55  
56  
57  
58  
59  
60

For peer review only

1  
2  
3  
4  
5  
6  
7  
8  
9  
10  
11  
12  
13  
14  
15  
16  
17  
18  
19  
20  
21  
22  
23  
24  
25  
26  
27  
28  
29  
30  
31  
32  
33  
34  
35  
36  
37  
38  
39  
40  
41  
42  
43  
44  
45  
46  
47  
48  
49  
50  
51  
52  
53  
54  
55  
56  
57  
58  
59  
60

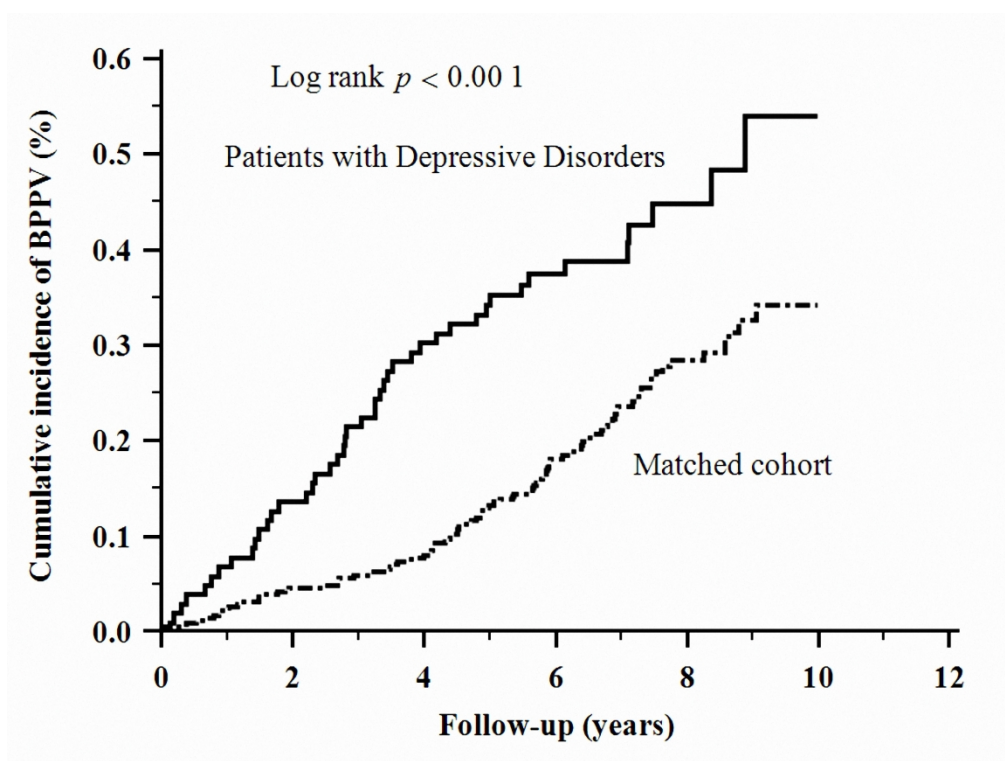

260x195mm (300 x 300 DPI)

STROBE Statement—Checklist of items that should be included in reports of *cohort studies*

|                              | Item No | Recommendation                                                                                                                                                                                                                                                                                                         | Page No |
|------------------------------|---------|------------------------------------------------------------------------------------------------------------------------------------------------------------------------------------------------------------------------------------------------------------------------------------------------------------------------|---------|
| <b>Title and abstract</b>    | 1       | (a) Indicate the study's design with a commonly used term in the title or the abstract<br>(b) Provide in the abstract an informative and balanced summary of what was done and what was found                                                                                                                          | 1       |
| <b>Introduction</b>          |         |                                                                                                                                                                                                                                                                                                                        |         |
| Background/rationale         | 2       | Explain the scientific background and rationale for the investigation being reported                                                                                                                                                                                                                                   | 4       |
| Objectives                   | 3       | State specific objectives, including any prespecified hypotheses                                                                                                                                                                                                                                                       | 5       |
| <b>Methods</b>               |         |                                                                                                                                                                                                                                                                                                                        |         |
| Study design                 | 4       | Present key elements of study design early in the paper                                                                                                                                                                                                                                                                | 6       |
| Setting                      | 5       | Describe the setting, locations, and relevant dates, including periods of recruitment, exposure, follow-up, and data collection                                                                                                                                                                                        | 5,6     |
| Participants                 | 6       | (a) Give the eligibility criteria, and the sources and methods of selection of participants. Describe methods of follow-up<br>(b) For matched studies, give matching criteria and number of exposed and unexposed                                                                                                      | 6       |
| Variables                    | 7       | Clearly define all outcomes, exposures, predictors, potential confounders, and effect modifiers. Give diagnostic criteria, if applicable                                                                                                                                                                               | 6       |
| Data sources/<br>measurement | 8*      | For each variable of interest, give sources of data and details of methods of assessment (measurement). Describe comparability of assessment methods if there is more than one group                                                                                                                                   | 5       |
| Bias                         | 9       | Describe any efforts to address potential sources of bias                                                                                                                                                                                                                                                              | 6,7     |
| Study size                   | 10      | Explain how the study size was arrived at                                                                                                                                                                                                                                                                              | 6       |
| Quantitative variables       | 11      | Explain how quantitative variables were handled in the analyses. If applicable, describe which groupings were chosen and why                                                                                                                                                                                           | 7       |
| Statistical methods          | 12      | (a) Describe all statistical methods, including those used to control for confounding<br>(b) Describe any methods used to examine subgroups and interactions<br>(c) Explain how missing data were addressed<br>(d) If applicable, explain how loss to follow-up was addressed<br>(e) Describe any sensitivity analyses | 7       |
| <b>Results</b>               |         |                                                                                                                                                                                                                                                                                                                        |         |
| Participants                 | 13*     | (a) Report numbers of individuals at each stage of study—eg numbers potentially eligible, examined for eligibility, confirmed eligible, included in the study, completing follow-up, and analysed<br>(b) Give reasons for non-participation at each stage<br>(c) Consider use of a flow diagram                        | 8       |
| Descriptive data             | 14*     | (a) Give characteristics of study participants (eg demographic, clinical, social) and information on exposures and potential confounders<br>(b) Indicate number of participants with missing data for each variable of interest<br>(c) Summarise follow-up time (eg, average and total amount)                         | 9       |
| Outcome data                 | 15*     | Report numbers of outcome events or summary measures over time                                                                                                                                                                                                                                                         | 8,9     |

|    |                          |    |                                                                                                                                                                                                              |       |
|----|--------------------------|----|--------------------------------------------------------------------------------------------------------------------------------------------------------------------------------------------------------------|-------|
| 1  | Main results             | 16 | (a) Give unadjusted estimates and, if applicable, confounder-adjusted estimates and their precision (eg, 95% confidence interval). Make clear which confounders were adjusted for and why they were included | 8,9   |
| 2  |                          |    | (b) Report category boundaries when continuous variables were categorized                                                                                                                                    |       |
| 3  |                          |    | (c) If relevant, consider translating estimates of relative risk into absolute risk for a meaningful time period                                                                                             |       |
| 4  |                          |    |                                                                                                                                                                                                              |       |
| 5  |                          |    |                                                                                                                                                                                                              |       |
| 6  |                          |    |                                                                                                                                                                                                              |       |
| 7  |                          |    |                                                                                                                                                                                                              |       |
| 8  | Other analyses           | 17 | Report other analyses done—eg analyses of subgroups and interactions, and sensitivity analyses                                                                                                               | 9     |
| 9  |                          |    |                                                                                                                                                                                                              |       |
| 10 | <b>Discussion</b>        |    |                                                                                                                                                                                                              |       |
| 11 |                          |    |                                                                                                                                                                                                              |       |
| 12 | Key results              | 18 | Summarise key results with reference to study objectives                                                                                                                                                     | 9     |
| 13 | Limitations              | 19 | Discuss limitations of the study, taking into account sources of potential bias or imprecision. Discuss both direction and magnitude of any potential bias                                                   | 11    |
| 14 |                          |    |                                                                                                                                                                                                              |       |
| 15 | Interpretation           | 20 | Give a cautious overall interpretation of results considering objectives, limitations, multiplicity of analyses, results from similar studies, and other relevant evidence                                   | 10,11 |
| 16 |                          |    |                                                                                                                                                                                                              |       |
| 17 |                          |    |                                                                                                                                                                                                              |       |
| 18 | Generalisability         | 21 | Discuss the generalisability (external validity) of the study results                                                                                                                                        | 11,12 |
| 19 |                          |    |                                                                                                                                                                                                              |       |
| 20 | <b>Other information</b> |    |                                                                                                                                                                                                              |       |
| 21 | Funding                  | 22 | Give the source of funding and the role of the funders for the present study and, if applicable, for the original study on which the present article is based                                                | 12    |
| 22 |                          |    |                                                                                                                                                                                                              |       |

\*Give information separately for exposed and unexposed groups.

**Note:** An Explanation and Elaboration article discusses each checklist item and gives methodological background and published examples of transparent reporting. The STROBE checklist is best used in conjunction with this article (freely available on the Web sites of PLoS Medicine at <http://www.plosmedicine.org/>, Annals of Internal Medicine at <http://www.annals.org/>, and Epidemiology at <http://www.epidem.com/>). Information on the STROBE Initiative is available at <http://www.strobe-statement.org>.

# BMJ Open

## Risk of Benign Paroxysmal Positional Vertigo in Patients with Depressive Disorders: A Nationwide Population-Based Cohort Study

|                                 |                                                                                                                                                                                                                                                                                                                                                                                                                                                                                                                                                                                                                                                                                                                                                                                                                                                                                                       |
|---------------------------------|-------------------------------------------------------------------------------------------------------------------------------------------------------------------------------------------------------------------------------------------------------------------------------------------------------------------------------------------------------------------------------------------------------------------------------------------------------------------------------------------------------------------------------------------------------------------------------------------------------------------------------------------------------------------------------------------------------------------------------------------------------------------------------------------------------------------------------------------------------------------------------------------------------|
| Journal:                        | <i>BMJ Open</i>                                                                                                                                                                                                                                                                                                                                                                                                                                                                                                                                                                                                                                                                                                                                                                                                                                                                                       |
| Manuscript ID                   | bmjopen-2018-026936.R1                                                                                                                                                                                                                                                                                                                                                                                                                                                                                                                                                                                                                                                                                                                                                                                                                                                                                |
| Article Type:                   | Research                                                                                                                                                                                                                                                                                                                                                                                                                                                                                                                                                                                                                                                                                                                                                                                                                                                                                              |
| Date Submitted by the Author:   | 11-Dec-2018                                                                                                                                                                                                                                                                                                                                                                                                                                                                                                                                                                                                                                                                                                                                                                                                                                                                                           |
| Complete List of Authors:       | Hsu, Chiao-Lin; Kaohsiung Veterans General Hospital, Department of Health Management Center; Kaohsiung Veterans General Hospital, Center for Geriatrics and Gerontology<br>Tsai, Shih-Jen; Taipei Veterans General Hospital, Department of Psychiatry; National Yang-Ming University, Taipei, Taiwan, Division of Psychiatry, Faculty of Medicine<br>Shen, Cheng-Che; Taichung Veterans General Hospital Chiayi Branch, Department of Psychiatry; National Yang-Ming University, Division of Psychiatry, Faculty of Medicine<br>Lu, Ti; Kaohsiung Veterans General Hospital, Department of Psychiatry<br>Hung, Yao-Min; Kaohsiung Veterans General Hospital, Department of Emergency Medicine; National Yang-Ming University, School of Medicine<br>Hu, Li-Yu; Taipei Veterans General Hospital, Department of Psychiatry; National Yang-Ming University, Division of Psychiatry, Faculty of Medicine |
| <b>Primary Subject Heading</b>: | Ear, nose and throat/otolaryngology                                                                                                                                                                                                                                                                                                                                                                                                                                                                                                                                                                                                                                                                                                                                                                                                                                                                   |
| Secondary Subject Heading:      | Epidemiology, General practice / Family practice, Mental health, Rehabilitation medicine                                                                                                                                                                                                                                                                                                                                                                                                                                                                                                                                                                                                                                                                                                                                                                                                              |
| Keywords:                       | depressive disorder, hyperthyroidism, risk factor, cohort study, systemic lupus erythematosus, benign paroxysmal positional vertigo                                                                                                                                                                                                                                                                                                                                                                                                                                                                                                                                                                                                                                                                                                                                                                   |
|                                 |                                                                                                                                                                                                                                                                                                                                                                                                                                                                                                                                                                                                                                                                                                                                                                                                                                                                                                       |

SCHOLARONE™  
Manuscripts

# Risk of Benign Paroxysmal Positional Vertigo in Patients with Depressive Disorders: A Nationwide Population-Based Cohort Study

Chiao-Lin Hsu<sup>1,2,3</sup>, Shih-Jen Tsai<sup>4,5</sup>, Cheng-Che Shen<sup>5,6,7</sup>, Ti Lu<sup>8</sup>, Yao-Min Hung<sup>9,10</sup>, Li-Yu

Hu<sup>4,5\*</sup>

<sup>1</sup>Center for Health Examination, Kaohsiung Veterans General Hospital, Kaohsiung, Taiwan

<sup>2</sup>Department of Nursing, Meiho University, Pingtung, Taiwan; <sup>3</sup> Center for Geriatrics and Gerontology, Kaohsiung Veterans General Hospital Kaohsiung, Taiwan; <sup>4</sup>Department of Psychiatry, Taipei Veterans General Hospital, Taipei; <sup>5</sup>Division of Psychiatry, Faculty of Medicine, National Yang-Ming University, Taipei, Taiwan; <sup>6</sup>Department of information management, National Chung-Cheng University, Chiayi, Taiwan; <sup>7</sup>Department of Psychiatry, Chiayi branch, Taichung Veterans General Hospital, Chiayi, Taiwan; <sup>8</sup>Department of Psychiatry, Kaohsiung Veterans General Hospital, Kaohsiung, Taiwan; <sup>9</sup>Department of Emergency Medicine, Kaohsiung Veterans General Hospital, Kaohsiung, Taiwan; <sup>10</sup>School of Medicine, National Yang Ming University, Taipei, Taiwan

**\*Please correspondence to Li-Yu Hu M.D.**

Postal Address: No.201, Sec. 2, Shipai Rd., Beitou District, Taipei City, Taiwan 11217,

R.O.C

CORRESPONDING AUTHOR'S EMAIL ADDRESS: chrishuly@gmail.com

Telephone number: +886-2-2875-7808

**Word count:** 3234

## 1 Abstract

2 **Objective:** The association between depression and benign paroxysmal positional vertigo  
3 (BPPV) remains debated. This study aimed to investigate the risk of BPPV in patients with  
4 depressive disorders.

5 **Design:** Longitudinal nationwide cohort study

6 **Setting:** National health insurance research database in Taiwan

7 **Participants:** We enrolled 10,297 patients diagnosed with depressive disorders between 2000  
8 and 2009 and compared them to 41,188 selected control patients who had never been  
9 diagnosed with depressive disorders (at a 1:4 ratio matched by age, gender and index date) in  
10 relation to the risk of developing BPPV.

11 **Methods:** The follow-up period was defined as the time from the initial diagnosis of  
12 depressive disorders to the date of BPPV, censoring, or 31 December 2009. Cox proportional  
13 hazards regression analysis was used to investigate the risk of BPPV by sex, age, and  
14 comorbidities, with hazard ratios (HRs) and 95% confidence intervals (CIs).

15 **Results:** During the 9-year follow-up period, 44 (0.59 per 1,000 person-years) patients with  
16 depressive disorders and 99 (0.33 per 1,000 person-years) control patients were diagnosed  
17 with BPPV. The incidence risk ratio of BPPV among both cohorts calculating from events of  
18 BPPV per 1,000 person-years of observation time was 1.79 (95% CI, 1.23–2.58,  $p = .002$ ).  
19 Following adjustments for age, sex, and comorbidities, patients with depressive disorders  
20 were 1.55 times more likely to develop BPPV (95% CI, 1.08–2.23,  $p = .019$ ) as compared to  
21 control patients. In addition, hyperthyroidism (HR = 3.75, 95% CI, 1.67–8.42,  $p = .001$ ) and  
22 systemic lupus erythematosus (SLE) (HR = 3.47, 95% CI, 1.07–11.22,  $p = .038$ ) were potential  
23 risk factors for new-onset BPPV in patients with depressive disorders.



1  
2  
3 24 **Conclusions:** Patients with depressive disorders may have an increased risk of developing  
4  
5 25 BPPV, especially those who have hyperthyroidism and SLE.  
6  
7  
8 26

9  
10 27 **Keywords:** Depressive disorders; benign paroxysmal positional vertigo; hyperthyroidism;  
11  
12 28 systemic lupus erythematosus; risk factor; cohort study  
13

### 14 29 **Strengths and limitations of this study**

- 15  
16  
17 30 1. The incidence of benign peripheral persistent vertigo (BPPV) among depressive disorders  
18  
19 31 patient remains unclear. This longitudinal population-based data was conducted to assess the  
20  
21 32 risk of BPPV in patients with depressive disorders.  
22  
23  
24 33 2. The NHIRD lacks detailed clinical data regarding severity and outcomes of BPPV  
25  
26 34 3. Results from our study may underestimate the current condition since only patients  
27  
28 35 seeking medical service would be identified in the Registry of NHIRD.  
29  
30  
31  
32  
33  
34  
35

## 37 **Introduction**

38 Depressive disorders are common mood disorders occurring in all populations and the  
39 Global Burden of Disease 2017 had refereed depressive disorders as a leading cause of health  
40 burden across the globe.<sup>1</sup> Patients with depressive disorders have been reported with an  
41 increased risk of mortality and propose the classification of depressive disorders as  
42 life-threatening.<sup>2,3</sup> Furthermore, people with depressive disorders have been reported with  
43 many somatic symptoms and result in increased need for clinical services, associated  
44 economic costs,<sup>4,5</sup> and considerable loss in quality of life.<sup>6</sup>

45 BPPV have been reported with a lifetime prevalence of 2.4%, is the most common type  
46 of peripheral vertigo. Which is characterized by brief spinning sensations, usually induced by  
47 a sudden change in head position with respect to gravity, with attacks generally lasting less  
48 than 1 minute. The fundamental pathophysiology of BPPV is dislodged calcium carbonate  
49 crystals in the utricle of the inner ear entering the semicircular canals.<sup>7</sup> Old age<sup>8</sup> and several  
50 co-morbidities, such as hypertension<sup>9</sup>, diabetes mellitus<sup>9</sup>, hypercholesterolemia<sup>10</sup>, pre-existing  
51 cardiovascular, thyroid and autoimmune<sup>10</sup> disease have been regarded as risk factors of BPPV.  
52 Patients who suffered from BPPV related symptoms and following economic burden have  
53 also been reported<sup>11</sup>.

1  
2  
3  
4 54 Psychiatric disorders or emotional stress are frequently observed in patients suffering  
5  
6  
7 55 from vertigo.<sup>12 13</sup> The results of most studies have been reported the higher rate of coexistence  
8  
9  
10 56 of depression and vestibular disorders<sup>14-16</sup>. Which may lead to a vicious circle and a serious  
11  
12  
13 57 influence on the quality of life<sup>17</sup>. Peripheral vertigo may play an essential role in the  
14  
15  
16 58 pathophysiology of development of subsequent depressive disorder. However, most of these  
17  
18  
19 59 studies report contradictory or conflicting results. Furthermore, when specified to explore the  
20  
21  
22 60 association between depression and BPPV, only a relatively small-scaled case-control study  
23  
24  
25 61 indicates that life stressors and related depressive disorder may be seen as a trigger of  
26  
27  
28 62 vestibular dysfunction, that is, a potential precursor of BPPV.<sup>18</sup>

31 63 Therefore, considering the debates on the association between the depression and  
32  
33  
34 64 BPPV and no large-scaled study have tried to investigate the issue, we designed a nationwide  
35  
36  
37 65 retrospective cohort study to explore the association between depressive disorder and the  
38  
39  
40 66 subsequent BPPV development. In addition, independent risk factors for developing BPPV  
41  
42  
43 67 among patients with depressive disorders were also investigated.

## 46 68 **Materials and Methods**

### 49 69 *Data Sources*

52 70 Nearly 99% of Taiwan's population utilizes health care services as a consequence of the  
53  
54  
55 71 National Health Insurance (NHI) Program Bold Legislative Act enacted in 1995.<sup>19</sup> The

1  
2  
3  
4 72 program offers comprehensive medical care coverage regarding outpatient, inpatient,  
5  
6  
7 73 emergency visits, and Chinese medicine to all residents of Taiwan. The NHI research  
8  
9  
10 74 database (NHIRD) contains comprehensive information with regard to clinical practice,  
11  
12  
13 75 including prescription details and diagnostic codes in the International Classification of  
14  
15  
16 76 Diseases, Ninth revision, Clinical Modification (ICD-9-CM) format. The NHIRD is managed  
17  
18  
19 77 by the National Health Research Institutes (NHRI) and privacy is maintained according to  
20  
21  
22 78 directives from the Bureau of the NHI.<sup>20</sup> The data source for our study was obtained from the  
23  
24  
25 79 Longitudinal Health Insurance Database 2000 (LHID2000), a dataset of the NHIRD. The  
26  
27  
28 80 LHID 2000, which contains all original claims data for 1,000,000 subjects, is a representative  
29  
30  
31 81 database randomly selected from the 2000 Registry of Beneficiaries under the NHI program.  
32  
33  
34 82 Which also maintains the registration data of everyone who was a beneficiary of the National  
35  
36  
37 83 Health Insurance program during the period of 1996–2000. Moreover, the NHRI affirms that  
38  
39  
40 84 there are no statistical differences in the distributions of age, sex, or health care costs between  
41  
42  
43 85 the data in the LHID2000 and that of the NHIRD.<sup>20</sup> For each patient with depressive  
44  
45  
46 86 disorders included in the final cohort

#### 47 48 49 87 *Availability of Data and Materials section*

50  
51  
52 88 The NHIRD is addressed in publicity by the NHRI and the use of NHIRD is only for  
53  
54  
55 89 research purposes. All applicants must obey the Computer-Processed Personal Data  
56  
57  
58  
59  
60

1  
2  
3  
4 90 Protection Law<sup>21</sup> and relevant regulations of Bureau of National Health Insurance and NHRI.

5  
6  
7 91 Moreover, applicants and their supervisor were asking for signing agreements upon

8  
9  
10 92 application submission. All applications are reviewed for approval of data delivered. Request

11  
12  
13 93 for the dataset may be sent an e-mail to the NHRI at [nhird@nhri.org.tw](mailto:nhird@nhri.org.tw) or call at

14  
15  
16 94 +886-037-246166 ext. 33603 for immediate service. Office Hour: Monday-Friday 8:00-17:30

17  
18  
19 95 (UTC+8).

20  
21  
22 96 The NHIRD, which was open to the researchers in Taiwan, was available from the

23  
24  
25 97 Health and Welfare Data Science Center (HWDC), Ministry of Health and Welfare (MOHW)

26  
27  
28 98 (<http://www.mohw.gov.tw/cht/DOS/>). The data underlying this study is from the NHIRD.

29  
30  
31 99 Interested researchers can obtain the data through formal application to the Ministry of Health

32  
33  
34 100 and Welfare, Taiwan. In the last sentence of the paragraph, which said "Kindly visit MOHW

35  
36  
37 101 and NHIA on-site services for National Health Insurance Data." The Database was transferred

38  
39  
40 102 to a higher-level government administration, called the "Health and Welfare Data Science

41  
42  
43 103 Center (HWDC)" for more efficient health-related data linkage, wider application, and better

44  
45  
46 104 security management. At present, interested researchers could still obtain the National Health

47  
48  
49 105 Insurance Data in Taiwan through formal application to the Health and Welfare Data Science

50  
51  
52 106 Center (HWDC), Department of Statistics, Ministry of Health and Welfare (MOHW). HWDC,

53  
54  
55 107 MOHW website (Chinese only currently): <http://dep.mohw.gov.tw/DOS/np-2497-113.html>

1  
2  
3  
4 108 *Study design and subjects*  
5  
6

7 109 We utilized data from the LHID 2000 and conducted a retrospective cohort study using a  
8  
9  
10 110 dataset collected between January 1, 2000 and December 31, 2004. We enrolled patients  $\geq 20$   
11  
12  
13 111 years and received at least twice diagnosis of depressive disorders by psychiatrists with  
14  
15  
16 112 ICD-9-CM depressive disorders diagnosis codes of 296.2X-296.3X, 300.4, and 311.X. We  
17  
18  
19 113 defined the date of enrolling an adult patient with depressive disorders as case cohort between  
20  
21  
22 114 2000 and 2004 as enrolment date. We excluded both in depressive disorders and control  
23  
24  
25 115 groups who were previously diagnosed with BPPV (ICD-9-CM code 386.11) before the  
26  
27  
28 116 enrollment date. We also used A-code (A-code: A249) to exclude patients who had vertigo  
29  
30  
31 117 related diagnoses before diagnosed with BPPV between 1996 and 2000. Which included  
32  
33  
34 118 acute myringitis, chronic myringitis, perforation of tympanic membrane, traumatic perforation  
35  
36  
37 119 of tympanic membrane, cholesteatoma of the middle ear, Meniere's disease, peripheral vertigo,  
38  
39  
40 120 vestibulopathy, vertigo of central origin, labyrinthitis, presbycusis, sudden hearing loss,  
41  
42  
43 121 tinnitus, and otalgia  
44  
45

46 122 The A-code, a much briefer version of the ICD-9-CM codes, is another disease  
47  
48  
49 123 classification system launched for fulfilling medical claims. The A-code was mainly used for  
50  
51  
52 124 ambulatory care before 2000 in Taiwan and has switched to the ICD-9-CM codes by NHI  
53  
54  
55 125 program since 2000 to perpetuate consistency between different claims records and to truly  
56  
57  
58  
59  
60

1  
2  
3  
4 126 reflect the distribution of various diseases. The cohort including patients with and without  
5  
6  
7 127 depressive disorders was observed until the development of BPPV, death, withdrawal from  
8  
9  
10 128 the NHI system, or December 31, 2009. The primary clinical outcome in our study was only  
11  
12  
13 129 BPPV diagnosed by neurologists or otorhinolaryngologists. For each patient with depressive  
14  
15  
16 130 disorders included in the final cohort, 4 age- and sex-matched control patients without  
17  
18  
19 131 depressive disorders were randomly selected on the same enrolment date from the LHID 2000.  
20  
21  
22 132 Finally, we identified 10,297 patients with depressive disorders. To assemble a comparison  
23  
24  
25 133 cohort, we randomly selected 41,188 enrollees without a history of depressive disorders.  
26  
27

#### 28 134 *Ethics Statement*

29  
30  
31 135 This study was approved by the Institutional Review Board of the Kaohsiung Veterans  
32  
33  
34 136 General Hospital (No.: VGHKS14-CT7-07). We could not obtain written consent from study  
35  
36  
37 137 patients as the NHI dataset consists of de-identified secondary data for research purposes. The  
38  
39  
40 138 IRB of Kaohsiung Veterans General Hospital issued a formal written waiver for the need for  
41  
42  
43 139 consent.  
44  
45

#### 46 140 *Statistical analyses*

47  
48  
49 141 The incidence of newly diagnosed BPPV in patients with depressive disorders and  
50  
51 142 controls during the observational period was calculated and stratified by sex and age ( $\geq 65$   
52  
53 143 years or  $< 65$  years). Comparisons between continuous variables were conducted with the  
54  
55  
56 144 independent *t*-test. Chi-squared analysis was used to examine the association of two  
57  
58  
59  
60

1  
2  
3 145 categorical characteristics between the depressive disorders and control cohort. A Cox  
4  
5 146 proportional hazards model was used to evaluate confounding variables and whether  
6  
7 147 depressive disorders increase the risk of developing BPPV. The confounding variables were  
8  
9 148 age, sex, and common comorbidities including hypertension, diabetes mellitus, dyslipidemia,  
10  
11 149 coronary artery disease, hyperthyroidism, hypothyroidism, cerebrovascular disease, and  
12  
13 150 systemic lupus erythematosus (SLE). Another Cox proportional-hazards regression model  
14  
15 151 was performed again to identify variables that predicted BPPV in the patients with depressive  
16  
17 152 disorders. The variables that demonstrated a moderately significant statistical relationship  
18  
19 153 with BPPV in the univariate analysis ( $P < .1$ ) were entered through forward selection in a  
20  
21 154 multivariate analysis.  
22  
23  
24

25  
26 155 The cumulative incidences of BPPV were compared between depressive disorder and  
27  
28 156 control cohorts using Kaplan–Meier curves. Stratified log rank test was applied to determine  
29  
30 157 the differences in the risk for BPPV in the cohort.  
31  
32  
33

#### 34 158 *Patient and Public involvement*

35  
36 159 The data source used for this study was the claims data of Taiwan's NHIRD. We did not  
37  
38 160 involve patients/service users in the research question, the outcome measures, or the design or  
39  
40 161 implementation of the study. There are no plans to disseminate the results of the research to  
41  
42 162 study participants.  
43  
44  
45

## 46 163 **Results**

### 47 48 49 164 *Participant Selection*

50  
51  
52 165 We analyzed 10,297 patients with depressive disorders and 41,188 control patients. The  
53  
54  
55 166 majority of patients in the cohort were female (61%). The median age was 39 years  
56  
57  
58  
59  
60



1  
2  
3  
4 167 (interquartile range [IQR], 30–51 years), and the median follow-up period was 7.19 years  
5  
6  
7 168 (IQR = 5.96–8.48 years) for patients with depressive disorders and 7.22 years (IQR =  
8  
9  
10 169 6.00–8.51 years) for control patients ( $p = .002$ ). Table 1 includes comparisons of demographic,  
11  
12  
13 170 clinical variables, and socioeconomic data between the control and depressive cohorts. In the  
14  
15  
16 171 depressive disorders group, the most common comorbidities were hypertension (2,124  
17  
18  
19 172 patients, 20.6%), diabetes mellitus (1,236 patients, 12.0%), and dyslipidemia (1,541 patients,  
20  
21  
22 173 14.5%). As compared to the controls, depressive disorders patients had significantly more  
23  
24  
25 174 physical comorbidities. Besides, depressive disorders patients had a significantly higher  
26  
27  
28 175 prevalence in low-income populations (50.4% vs. 44.4%,  $p < .001$ ) and in urban areas (64.1%  
29  
30  
31 176 vs. 60.9%,  $p < .001$ ) as compared to non-depressive disorders patients.

### 34 177 ***Person-Time Incidence Rate of BPPV***

35  
36  
37 178 During the follow-up period, 44 patients (0.59 per 1,000 person-years) were diagnosed  
38  
39  
40 179 with BPPV in the depressive disorders group, and 99 patients (0.33 per 1,000 person-years)  
41  
42  
43 180 were diagnosed with BPPV in the control group. The incidence rate ratio (IRR) of BPPV  
44  
45  
46 181 between depressive disorders and control patients was 1.79 (95% CI [confidence interval],  
47  
48  
49 182 1.23–2.58,  $p = .002$ ). The IRR of BPPV remained higher in the depressive disorders than in the  
50  
51  
52 183 control patients among both sexes. When stratified with age, only patient younger than 65  
53  
54  
55 184 years old have higher IRR of BPPV. The results are shown in Table 2.

1  
2  
3  
4 185 The cumulative incidence of BPPV in the patients with depressive disorders was  
5  
6  
7 186 significantly higher than that in the control cohort (log-rank test,  $P < .001$ , Figure 1).  
8  
9

10 187 ***Risks of Newly Diagnosed BPPV among the Patients with and without Depressive***  
11  
12  
13 188 ***Disorders***  
14  
15

16 189 After adjusting for age, sex, common comorbidities and SLE there was a higher risk of  
17  
18  
19 190 developing BPPV in patients with depressive disorders than in the control patients (HR =1.55,  
20  
21  
22 191 95% CI, 1.08–2.23,  $p = .019$ ). Results are summarized in Table 3.  
23  
24

25 192 ***Risks Factors for BPPV in patients with Depressive Disorders***  
26  
27

28 193 As shown in Table 4, we predicted the development of BPPV in the depressive disorder  
29  
30  
31 194 cohorts by applying univariate analysis. Univariate analysis demonstrated that dyslipidemia  
32  
33  
34 195 (HR = 1.97, 95% CI, 0.99–3.89,  $p = .053$ ), hyperthyroidism (HR = 3.74, 95% CI, 1.67–8.38,  
35  
36  
37 196  $p < .001$ ), cerebrovascular disease (HR =2.31, 95% CI, 0.91-5.85,  $p = .079$ ) and SLE (HR =3.58,  
38  
39  
40 197 95% CI, 1.11-11.56,  $p = .033$ ) were possible prognostic factors. Multivariate analysis indicated  
41  
42  
43 198 that hyperthyroidism (HR = 3.75, 95% CI, 1.67–8.42,  $p = .001$ ) and SLE (HR = 3.47, 95% CI,  
44  
45  
46 199 1.07-11.22,  $p = .038$ ) were an independent risk factor for patients with depressive disorders.  
47  
48

49 200 **Discussion**  
50  
51

52 201 The two major findings in our study are as the following. First, patients with depressive  
53  
54  
55 202 disorders presented a 1.55 -fold greater risk of subsequently developing BPPV than did the  
56  
57  
58  
59  
60

1  
2  
3  
4 203 general population by utilizing a nationwide population-based cohort study. Secondly, only  
5  
6  
7 204 hyperthyroidism (HR = 3.75, 95% CI, 1.67–8.42, p= .001) and SLE (HR = 3.47, 95% CI,  
8  
9  
10 205 1.07-11.22, p= .038) were independent risk factors to develop BPPV among patients with  
11  
12  
13 206 depressive disorders.

16 207 The strength of this study is using a nationwide population-based data to evaluate BPPV  
17  
18  
19 208 risk in patients with depressive disorders. Advantages of using our NHIRD in medical  
20  
21  
22 209 research have been previously described,<sup>22</sup> which include enormous sample size, lack of  
23  
24  
25 210 selection and participation bias and long term comprehensive follow up. Whereas the results  
26  
27  
28 211 of most studies demonstrated the correlation between BPPV and following depressive  
29  
30  
31 212 disorders,<sup>23 24</sup> to the best of our knowledge, this is the first study implying that patients with  
32  
33  
34 213 depressive disorders have higher risk of developing BPPV.

37 214 Though depressive disorder have been reported to produce somatic symptoms including  
38  
39  
40 215 symptoms like BPPV,<sup>25</sup> one research indicated that patients with unrecognized BPPV were  
41  
42  
43 216 more likely to have depressive disorder.<sup>26</sup> Another study pointed out that depressive disorders  
44  
45  
46 217 may be an early presentation of neural circuitry alterations involving connections between the  
47  
48  
49 218 vestibular system and anatomical area such as hippocampus, amygdala, and infralimbic  
50  
51  
52 219 cortex.<sup>27</sup> One Asian literature showed that depression symptoms may adversely affect BPPV  
53  
54  
55  
56  
57  
58  
59  
60

1  
2  
3  
4 220 recurrence.<sup>28</sup> Though there was no strong evidence consistent with our findings, evidence  
5  
6  
7 221 mentioned above may indirectly prove our hypothesis.  
8  
9

10 222 The pathophysiology of depressive disorders and subsequent BPPV is unknown. There  
11  
12  
13 223 are several proposed mechanisms to explain this association. First, dysregulation of oxidative  
14  
15  
16 224 and inflammatory processes in depressive disorders may result in subsequent BPPV  
17  
18  
19 225 development. Numerous studies have demonstrated patients with depressive disorders have  
20  
21  
22 226 excessive oxidative stress and elevation in inflammatory responses.<sup>29-32</sup> Evidence supports a  
23  
24  
25 227 role for oxidative stress in otolith dysfunction leading to an increased risk of developing  
26  
27  
28 228 canalolithiasis, an essential step in the pathogenesis of BPPV.<sup>33-36</sup> Additional studies conclude  
29  
30  
31 229 depressive disorders associated with oxidative stress result in vestibular hair cells and  
32  
33  
34 230 neuronal damage in the inner ear,<sup>37</sup> which contributes to vestibular dysfunction and  
35  
36  
37 231 subsequent BPPV development.<sup>38 39</sup> Second, depressive disorders may induce abnormalities of  
38  
39  
40 232 the hypothalamus-pituitary-adrenal axis, which may hinder the inner ear blood flow and  
41  
42  
43 233 influence inner ear fluid balance. These abnormalities lead to dysfunction of the otoconial  
44  
45  
46 234 homeostasis,<sup>18 40</sup> an established risk factor for development of BPPV.<sup>41</sup> Therefore, alterations  
47  
48  
49 235 to the neuroendocrine system may be the link between depressive disorders and the  
50  
51  
52 236 development of BPPV. Third, BPPV development in depressive disorders may be induced by  
53  
54  
55 237 serotonin dysfunction. The vestibular nucleus complex is composed of a large number of  
56  
57  
58  
59  
60

1  
2  
3  
4 238 serotonin receptors, and lack of serotonin may result in a substantial impact on the  
5  
6  
7 239 electrophysiological activity of neurons, and dysfunction of the vestibular nucleus complex.<sup>42</sup>  
8  
9  
10 240 Previous studies have hypothesized a role for vestibular nucleus damage in the pathogenesis  
11  
12  
13 241 of BPPV development.<sup>39 43</sup>Fourth, the dysregulation of the immune system, frequently  
14  
15  
16 242 observed in depressive disorders,<sup>44 45</sup> has proved to be an essential part of BPPV pathogenesis.  
17  
18  
19 243 Stone and Francis<sup>46</sup> suggest BPPV could develop by immune system's direct attack or  
20  
21  
22 244 indirect attack, resulting in debris within the inner ears. This explanation could be confirmed  
23  
24  
25 245 by studies demonstrated the association of several autoimmune diseases, such as systemic  
26  
27  
28 246 sclerosis,<sup>47</sup>SLE, ulcerative colitis, Sjogren's syndrome, rheumatoid arthritis,<sup>46</sup> and chronic  
29  
30  
31 247 inflammatory demyelinating polyneuropathy<sup>48</sup> in the development of BPPV. The relation  
32  
33  
34 248 between immune system and BPPV was also in keeping with our result that SLE is a potential  
35  
36  
37 249 risk factor for developing BPPV.

40 250 We conclude patients with depressive disorders are more likely to develop BPPV if they  
41  
42  
43 251 are afflicted with hyperthyroidism. Mechanical movements of thyroid autoantibodies in the  
44  
45  
46 252 inner ear fluid or the development of autoimmune microangiitis in the labyrinth can result in  
47  
48  
49 253 BPPV in the presence of hyperthyroidism or hypothyroidism.<sup>49</sup> Other studies support a role  
50  
51  
52 254 for thyroid hormone fluctuations<sup>50</sup> and circulating anti-thyroid autoantibodies<sup>51</sup> related to  
53  
54  
55 255 vestibular dysfunction in subsequent BPPV development. Therefore, dysregulation of the

1  
2  
3  
4 256 immune system may play a vital role between hyperthyroidism and BPPV as documented by  
5  
6  
7 257 our study. In addition, we inferred that hyperthyroidism altered calcium metabolism and  
8  
9  
10 258 otoconia dissolve impairment may play a role in developing BPPV among depressive  
11  
12  
13 259 disorders patients. Up to 20 percent of thyrotoxic patients have mild hypercalcemia because  
14  
15  
16 260 of thyroid hormone-mediated bone resorption<sup>52</sup>. Otoconia, mainly synthesized from calcium<sup>53</sup>,  
17  
18  
19 261 which breaks free and moves into the semicircular canals was the fundamental  
20  
21  
22 262 pathophysiology of BPPV<sup>8</sup>. Therefore, hyperthyroidism with increased calcium might lead to  
23  
24  
25 263 increased concentration of free calcium in the endolymph and reduce its capacity to dissolve  
26  
27  
28 264 the dislodged otoconia<sup>54</sup>, this mechanism involved in the pathophysiology of BPPV.

29  
30  
31 265       Though there is no direct evidence support the pathophysiology of BPPV occurred in  
32  
33  
34 266 patients co-existence with depressive disorder and hyperthyroidism. Patients suffered from  
35  
36  
37 267 symptoms like palpitation, insomnia, anxiety, and irritability, which symptoms usually  
38  
39  
40 268 belonging to hyperthyroidism and was difficult to discriminate from the psychiatric disorder,  
41  
42  
43 269 have been proposed easily seeking medical treatment<sup>55</sup>. Therefore, we proposed that  
44  
45  
46 270 hyperthyroidism related panic -like symptoms may increase the chance of diagnosis of BPPV  
47  
48  
49 271 through greater medical contact.

50  
51  
52 272       There are several limitations in this study. The first limitation relates to the lack of  
53  
54  
55 273 detailed information regarding tobacco use, alcohol consumption, head position in bed, and

1  
2  
3  
4 274 family history of BPPV in patient data collected from the NHIRD, factors which may  
5  
6  
7 275 influence risk of BPPV development.<sup>56-58</sup> Thus, we were unable to control for these  
8  
9  
10 276 potentially confounding factors. Second, the NHIRD is an administrative database, which  
11  
12  
13 277 lacks detailed clinical data regarding severity and outcomes of BPPV patients, which  
14  
15  
16 278 interferes with analysis of BPPV prognoses in the cohort. Third, in the claims-based study  
17  
18  
19 279 design, only patients seeking medical service would be identified in the Registry of NHIRD  
20  
21  
22 280 and these identification issues may either overestimate or underestimate the results. Fourth,  
23  
24  
25 281 our study did not provide any information about medications administered for BPPV.

26  
27  
28 282 Since profound health burden and extensive health care utilization may be influential  
29  
30  
31 283 with BPPV development.<sup>59 60</sup> Our findings and findings in other literature raised our attention  
32  
33  
34 284 to unrecognized BPPV and inappropriate treatment among patients with depressive disorders  
35  
36  
37 285 may lead to disabling and related poor quality of life.

## 38 39 40 286 **Conclusions**

41  
42  
43 287 In the population-based retrospective study, we found that patients with depressive  
44  
45  
46 288 disorders have statistically higher risk of developing BPPV. Furthermore, hyperthyroidism  
47  
48  
49 289 and SLE were identified an independent risk factor to develop BPPV for patients with  
50  
51  
52 290 depressive disorders. Future studies are required to clarify the underlying biological  
53  
54  
55 291 mechanisms of these associations. Clinicians are encouraged to provide appropriate medical  
56  
57  
58  
59  
60

1  
2  
3  
4 292 care for those who diagnosed with BPPV and preexisting depressive disorder. Monitoring and  
5  
6  
7 293 management depressive symptoms for the high-risk patients are also warranted.  
8  
9

### 10 294 **List of abbreviations:**

11  
12  
13 295 BPPV, benign paroxysmal positional vertigo; NHI, National Health Insurance; LHID  
14  
15  
16 296 2000, Longitudinal Health Insurance Database 2000; NHIRD, National Health Insurance  
17  
18  
19 297 Research Database; ICD-9-CM, the International Classification of Diseases, ninth revision,  
20  
21  
22 298 Clinical Modification; IRRs, incidence rate ratios; HR, hazard ratio; aHR, adjusted hazard  
23  
24  
25 299 ratio; CI, confidence interval.  
26  
27

### 28 300 **Acknowledgments**

29  
30  
31 301 The authors would like to thank the Research Center of Medical informatics at  
32  
33  
34 302 Kaohsiung Veterans General Hospital for the technical assistance. The study is based on data  
35  
36  
37 303 from the National Health Insurance Research Database provided by the BNHI, Department of  
38  
39  
40 304 Health, Executive Yuan, Taiwan and managed by NHRI, Taiwan. We express our particular  
41  
42  
43 305 gratitude to the government organization BNHI and the non-profit foundation NHRI.  
44  
45

### 46 306 **Author contributions**

47  
48  
49 307 Chiao-Lin Hsu and Li-Yu, Hu wrote the manuscript. Cheng-Che Shen and Ti, Lu helped  
50  
51  
52 308 with study design and data collection. Cheng-Che Shen, Shih-Jen Tsai and Yao-Min Hung  
53  
54  
55 309 contributed to the revision of the manuscript. All authors read and approved the final  
56  
57  
58  
59  
60



1  
2  
3  
4 310 manuscript.  
5  
6

7 311 **Competing interests**  
8  
9

10 312 The authors declare that they have no conflict of interest.  
11  
12

13 313 **Funding**  
14  
15

16 314 This work was supported by grant NSC 101-2314-B-075-040 from the National Science  
17  
18  
19 315 Council, Taiwan, and grant V103C-048 from the Taipei Veterans General Hospital. The  
20  
21  
22 316 funding sources had no role in the study design or conduct, or in the decision to submit for  
23  
24  
25 317 publication.  
26  
27

28 318 **Legend for Figure 1:**  
29  
30

31 319 Fig.1 Cumulative incidence of benign paroxysmal positional vertigo in depressive disorders  
32  
33  
34 320 and comparison cohort  
35  
36

37 321 The cumulative incidence of benign paroxysmal positional vertigo in patients with depressive  
38  
39  
40 322 disorders was significantly higher than that in the comparison cohort  
41  
42  
43  
44  
45  
46  
47  
48  
49  
50  
51  
52  
53  
54  
55  
56  
57  
58  
59  
60

## References

1. Organization WH. Depression and Other Common Mental Disorders: Global Health Estimates. Geneva: World Health Organization. 2017:1-22.
2. Cuijpers P, Smit F. Excess mortality in depression: a meta-analysis of community studies. *Journal of affective disorders* 2002;72:227-36.
3. Kozela M, Bobak M, Besala A, et al. The association of depressive symptoms with cardiovascular and all-cause mortality in Central and Eastern Europe: Prospective results of the HAPIEE study. *European journal of preventive cardiology* 2016;23:1839-47.
4. Berto P, D'Ilario D, Ruffo P, et al. Depression: cost-of-illness studies in the international literature, a review. *The journal of mental health policy and economics* 2000;3:3-10.
5. Greenberg PE, Birnbaum HG. The economic burden of depression in the US: societal and patient perspectives. *Expert opinion on pharmacotherapy* 2005;6:369-76.
6. Jia H, Zack MM, Thompson WW, et al. Impact of depression on quality-adjusted life expectancy (QALE) directly as well as indirectly through suicide. *Social psychiatry and psychiatric epidemiology* 2015;50:939-49.
7. Fife TD, von Brevern M. Benign Paroxysmal Positional Vertigo in the Acute Care Setting. *Neurologic clinics* 2015;33:601-17.
8. Kim JS, Zee DS. Clinical practice. Benign paroxysmal positional vertigo. *N Engl J Med* 2014;370:1138-47.
9. De Stefano A, Dispenza F, Suarez H, et al. A multicenter observational study on the role of comorbidities in the recurrent episodes of benign paroxysmal positional vertigo. *Auris Nasus Larynx* 2014;41:31-6.
10. Messina A, Casani AP, Manfrin M, et al. Italian survey on benign paroxysmal positional vertigo. *Acta otorhinolaryngologica Italica : organo ufficiale della Societa italiana di otorinolaringologia e chirurgia cervico-facciale* 2017;37:328-35.
11. Benecke H, Agus S, Kuessner D, et al. The Burden and Impact of Vertigo: Findings from the REVERT Patient Registry. *Frontiers in neurology* 2013;4:136.
12. Ketola S, Havia M, Appelberg B, et al. Psychiatric symptoms in vertiginous patients. *Nord J Psychiatry* 2015;69:287-91.
13. Soderman AC, Moller J, Bagger-Sjoberg D, et al. Stress as a trigger of attacks in Meniere's disease. A case-crossover study. *The Laryngoscope* 2004;114:1843-8.

1  
2  
3 14. Monzani D, Casolari L, Guidetti G, et al. Psychological distress and disability  
4 in patients with vertigo. *Journal of psychosomatic research* 2001;50:319-23.  
5

6 15. Chen ZJ, Chang CH, Hu LY, et al. Increased risk of benign paroxysmal  
7 positional vertigo in patients with anxiety disorders: a nationwide population-based  
8 retrospective cohort study. *BMC psychiatry* 2016;16:238.  
9

10 16. Yuan Q, Yu L, Shi D, et al. Anxiety and depression among patients with  
11 different types of vestibular peripheral vertigo. *Medicine (Baltimore)* 2015;94:e453.  
12

13 17. Best C, Eckhardt-Henn A, Tschan R, et al. Psychiatric morbidity and  
14 comorbidity in different vestibular vertigo syndromes. Results of a prospective  
15 longitudinal study over one year. *Journal of neurology* 2009;256:58-65.  
16

17 18. Monzani D, Genovese E, Rovatti V, et al. Life events and benign paroxysmal  
18 positional vertigo: a case-controlled study. *Acta Otolaryngol* 2006;126:987-92.  
19

20 19. Cheng TM. Taiwan's new national health insurance program: genesis and  
21 experience so far. *Health Aff (Millwood)* 2003;22:61-76.  
22

23 20. NHRI CfBRo. Database. NHRI National Health Research Institutes. Taiwan:  
24 Center for Biomedical Resources of NHRI; [Available from:  
25 <http://nhird.nhri.org.tw/en/2018>.  
26

27 21. Lawrence Ong KC. Data Protection 2018 Taiwan Taiwan2018 [updated  
28 12/06/2018; cited 2018. Available from:  
29 <https://iclg.com/practice-areas/data-protection-laws-and-regulations/taiwan> accessed  
30 12/06/2018 2018.  
31

32 22. Hsing AW, Ioannidis JP. Nationwide Population Science: Lessons From the  
33 Taiwan National Health Insurance Research Database. *JAMA internal medicine*  
34 2015;175:1527-9.  
35

36 23. Hagr A. Comorbid psychiatric conditions of benign paroxysmal positional  
37 vertigo. *Int J Health Sci (Qassim)* 2009;3:23-8.  
38

39 24. Eckhardt-Henn A, Best C, Bense S, et al. Psychiatric comorbidity in different  
40 organic vertigo syndromes. *Journal of neurology* 2008;255:420-8.  
41

42 25. Ferrari S, Monzani D, Baraldi S, et al. Vertigo "in the pink": The impact of  
43 female gender on psychiatric-psychosomatic comorbidity in benign paroxysmal  
44 positional vertigo patients. *Psychosomatics* 2014;55:280-8.  
45

46 26. van der Zaag-Loonen HJ, van Leeuwen RB, Brintjes TD, et al. Prevalence  
47 of unrecognized benign paroxysmal positional vertigo in older patients. *European*  
48 *archives of oto-rhino-laryngology : official journal of the European Federation of*  
49 *Oto-Rhino-Laryngological Societies (EUFOS) : affiliated with the German Society for*  
50 *Oto-Rhino-Laryngology - Head and Neck Surgery* 2015;272:1521-4.  
51

1  
2  
3 27. Gurvich C, Maller JJ, Lithgow B, et al. Vestibular insights into cognition and  
4 psychiatry. *Brain research* 2013;1537:244-59.

5  
6 28. Wei W, Sayyid ZN, Ma X, et al. Presence of Anxiety and Depression  
7 Symptoms Affects the First Time Treatment Efficacy and Recurrence of Benign  
8 Paroxysmal Positional Vertigo. *Frontiers in neurology* 2018;9:178.

9  
10 29. Sarandol A, Sarandol E, Eker SS, et al. Major depressive disorder is  
11 accompanied with oxidative stress: short-term antidepressant treatment does not alter  
12 oxidative-antioxidative systems. *Human psychopharmacology* 2007;22:67-73.

13  
14 30. Cudney LE, Sassi RB, Behr GA, et al. Alterations in circadian rhythms are  
15 associated with increased lipid peroxidation in females with bipolar disorder. *The*  
16 *international journal of neuropsychopharmacology / official scientific journal of the*  
17 *Collegium Internationale Neuropsychopharmacologicum (CINP)* 2014;17:715-22.

18  
19 31. Szuster-Ciesielska A, Slotwinska M, Stachura A, et al. Accelerated apoptosis  
20 of blood leukocytes and oxidative stress in blood of patients with major depression.  
21 *Progress in neuro-psychopharmacology & biological psychiatry* 2008;32:686-94.

22  
23 32. Widner B, Fuchs D, Leblhuber F, et al. Does disturbed homocysteine and  
24 folate metabolism in depression result from enhanced oxidative stress? *Journal of*  
25 *neurology, neurosurgery, and psychiatry* 2001;70:419.

26  
27 33. Tsai KL, Cheng YY, Leu HB, et al. Investigating the role of Sirt1-modulated  
28 oxidative stress in relation to benign paroxysmal positional vertigo and Parkinson's  
29 disease. *Neurobiology of aging* 2015;36:2607-16.

30  
31 34. Kaya H, Gokdemir MT, Sogut O, et al. Evaluation of oxidative status and  
32 trace elements in patients with benign paroxysmal positional vertigo. *HealthMed*  
33 2013;7:72-9.

34  
35 35. Goto F, Hayashi K, Kunihiro T, et al. The possible contribution of angiitis to  
36 the onset of benign paroxysmal positional vertigo (BPPV). *The international tinnitus*  
37 *journal* 2010;16:25-8.

38  
39 36. Fujita N, Yamanaka T, Okamoto H, et al. Horizontal canal benign  
40 paroxysmal positional vertigo--its affected side and horizontal semicircular canal  
41 function. *Nihon Jibiinkoka Gakkai kaiho* 2005;108:202-6.

42  
43 37. Iwasaki S, Yamasoba T. Dizziness and Imbalance in the Elderly: Age-related  
44 Decline in the Vestibular System. *Aging Dis* 2015;6:38-47.

45  
46 38. Xu Z, Zhao P, Yang X, et al. The hearing and vestibular evoked myogenic  
47 potentials test in patients with primary benign paroxysmal positional vertigo. *Lin*  
48 *chuang er bi yan hou tou jing wai ke za zhi = Journal of clinical otorhinolaryngology,*  
49 *head, and neck surgery* 2015;29:20-3.

- 1  
2  
3 39. Frohman EM, Kramer PD, Dewey RB, et al. Benign paroxysmal positioning  
4 vertigo in multiple sclerosis: diagnosis, pathophysiology and therapeutic techniques.  
5 *Multiple sclerosis (Houndmills, Basingstoke, England)* 2003;9:250-5.  
6  
7  
8 40. Horner KC, Cazals Y. Stress in hearing and balance in Meniere's disease.  
9 *Noise & health* 2003;5:29-34.  
10  
11 41. Fuchs E, Flugge G. Chronic social stress: effects on limbic brain structures.  
12 *Physiol Behav* 2003;79:417-27.  
13  
14 42. Smith PF, Darlington CL. A possible explanation for dizziness following  
15 SSRI discontinuation. *Acta Otolaryngol* 2010;130:981-3.  
16  
17 43. Fetter M. Vestibulo-ocular reflex. *Developments in ophthalmology*  
18 2007;40:35-51.  
19  
20 44. ChiriTa AL, Gheorman V, Bondari D, et al. Current understanding of the  
21 neurobiology of major depressive disorder. *Romanian journal of morphology and*  
22 *embryology = Revue roumaine de morphologie et embryologie* 2015;56:651-8.  
23  
24 45. Hodes GE, Kana V, Menard C. Neuroimmune mechanisms of depression.  
25 2015;18:1386-93.  
26  
27 46. Stone JH, Francis HW. Immune-mediated inner ear disease. *Current opinion*  
28 *in rheumatology* 2000;12:32-40.  
29  
30 47. Thombs BD, Jewett LR, Kwakkenbos L, et al. Major depression diagnoses  
31 among patients with systemic sclerosis: baseline and one-month followup. *Arthritis*  
32 *care & research* 2015;67:411-6.  
33  
34 48. Frohman EM, Tusa R, Mark AS, et al. Vestibular dysfunction in chronic  
35 inflammatory demyelinating polyneuropathy. *Annals of neurology* 1996;39:529-35.  
36  
37 49. Papi G, Guidetti G, Corsello SM, et al. The association between benign  
38 paroxysmal positional vertigo and autoimmune chronic thyroiditis is not related to  
39 thyroid status. *Thyroid* 2010;20:237-8.  
40  
41 50. Lautermann J, ten Cate W-JF. Postnatal expression of the  $\alpha$ -thyroid hormone  
42 receptor in the rat cochlea. *Hearing Research* 1997;107:23-8.  
43  
44 51. Chiarella G, Tognini S, Nacci A, et al. Vestibular disorders in euthyroid  
45 patients with Hashimoto's thyroiditis: role of thyroid autoimmunity. *Clinical*  
46 *endocrinology* 2014;81:600-5.  
47  
48 52. Iqbal AA, Burgess EH, Gallina DL, et al. Hypercalcemia in hyperthyroidism:  
49 patterns of serum calcium, parathyroid hormone, and 1,25-dihydroxyvitamin D3 levels  
50 during management of thyrotoxicosis. *Endocrine practice : official journal of the*  
51  
52  
53  
54  
55  
56  
57  
58  
59  
60

1  
2  
3 *American College of Endocrinology and the American Association of Clinical*  
4 *Endocrinologists* 2003;9:517-21.  
5

6  
7 53. Lundberg YW, Xu Y, Thiessen KD, et al. Mechanisms of otoconia and  
8 otolith development. *Developmental dynamics : an official publication of the*  
9 *American Association of Anatomists* 2015;244:239-53.  
10

11 54. Vibert D, Kompis M, Hausler R. Benign paroxysmal positional vertigo in  
12 older women may be related to osteoporosis and osteopenia. *The Annals of otology,*  
13 *rhinology, and laryngology* 2003;112:885-9.  
14

15  
16 55. Demet MM, Ozmen B, Deveci A, et al. Depression and anxiety in  
17 hypothyroidism. *Arch Med Res* 2002;33:552-6.  
18

19  
20 56. Sunami K, Tochino R, Tokuhara Y, et al. Effects of cigarettes and alcohol  
21 consumption in benign paroxysmal positioning vertigo. *Acta Otolaryngol*  
22 2006;126:834-8.  
23

24 57. Lopez-Escamez JA, Gamiz MJ, Finana MG, et al. Position in bed is  
25 associated with left or right location in benign paroxysmal positional vertigo of the  
26 posterior semicircular canal. *American journal of otolaryngology* 2002;23:263-6.  
27

28  
29 58. Gizzi M, Ayyagari S, Khattar V. The familial incidence of benign paroxysmal  
30 positional vertigo. *Acta Otolaryngol* 1998;118:774-7.  
31

32 59. Grill E, Penger M, Kentala E. Health care utilization, prognosis and outcomes  
33 of vestibular disease in primary care settings: systematic review. *Journal of neurology*  
34 2016;263 Suppl 1:S36-44.  
35

36  
37 60. Mueller M, Strobl R, Jahn K, et al. Burden of disability attributable to vertigo  
38 and dizziness in the aged: results from the KORA-Age study. *European journal of*  
39 *public health* 2014;24:802-7.  
40  
41  
42  
43  
44  
45  
46  
47  
48  
49  
50  
51  
52  
53  
54  
55  
56  
57  
58  
59  
60

**Table 1 Baseline Characteristics of Patients with and without Depressive Disorders**

| Demographic data             | Patients with Depressive Disorders |      | Patients without Depressive Disorders |      | <i>P</i> value |
|------------------------------|------------------------------------|------|---------------------------------------|------|----------------|
|                              | <i>n</i> = 10,297                  |      | <i>n</i> = 41,188                     |      |                |
|                              | <i>n</i>                           | %    | <i>n</i>                              | %    |                |
| Age (years) <sup>a</sup>     | 39 (30–51)                         |      | 39 (30–51)                            |      |                |
| ≥65                          | 1,036                              | 10.1 | 4,143                                 | 10.1 | .999           |
| <65                          | 9,261                              | 89.9 | 37,045                                | 89.9 |                |
| Sex                          |                                    |      |                                       |      |                |
| Male                         | 4,012                              | 39.0 | 16,048                                | 39.0 | 1.000          |
| Female                       | 6,285                              | 61.0 | 25,140                                | 61.0 |                |
| Comorbidities                |                                    |      |                                       |      |                |
| Hypertension                 | 2,124                              | 20.6 | 5,444                                 | 13.2 | <.001          |
| Diabetes mellitus            | 1,236                              | 12.0 | 3,112                                 | 7.5  | <.001          |
| Dyslipidemia                 | 1,541                              | 14.5 | 3,829                                 | 9.3  | <.001          |
| Coronary artery disease      | 87                                 | 0.8  | 235                                   | 0.6  | .002           |
| Hyperthyroidism              | 511                                | 5.0  | 727                                   | 1.8  | <.001          |
| Hypothyroidism               | 116                                | 1.1  | 193                                   | 0.5  | <.001          |
| Cerebrovascular disease      | 573                                | 5.6  | 1,106                                 | 2.7  | <.001          |
| Systemic lupus erythematosus | 216                                | 2.1  | 437                                   | 1.1  | <.001          |
| Degree of urbanization       |                                    |      |                                       |      |                |
| Urban                        | 6,599                              | 64.1 | 25,196                                | 60.9 | <.001          |
| Suburban                     | 2,680                              | 26.0 | 12,172                                | 29.4 |                |
| Rural                        | 817                                | 7.9  | 3,205                                 | 7.8  |                |
| Income group                 |                                    |      |                                       |      |                |
| Low income                   | 5,189                              | 50.4 | 18,340                                | 44.4 | <.001          |
| Medium income                | 3,819                              | 37.1 | 16,426                                | 39.7 |                |

|   |                              |                  |      |                  |      |
|---|------------------------------|------------------|------|------------------|------|
| 1 |                              |                  |      |                  |      |
| 2 |                              |                  |      |                  |      |
| 3 | High income                  | 1,289            | 12.5 | 6,422            | 15.5 |
| 4 |                              |                  |      |                  |      |
| 5 | Follow-up years <sup>a</sup> | 7.19 (5.96–8.48) |      | 7.22 (6.00–8.51) | .002 |
| 6 | <hr/>                        |                  |      |                  |      |

<sup>a</sup>Median (interquartile range)

For peer review only



**Table 2 Person-Time Incidence of Benign Paroxysmal Positional Vertigo (BPPV) in Patients with and without Depressive Disorders**

|        | Patients with Depressive Disorders |                        | Patients without Depressive Disorders |                        | Rate ratio (95% CI) | <i>P</i> value |
|--------|------------------------------------|------------------------|---------------------------------------|------------------------|---------------------|----------------|
|        | No. of BPPV                        | Per 1,000 person-years | No. of BPPV                           | Per 1,000 person-years |                     |                |
| Total  | 44                                 | 0.59                   | 99                                    | 0.33                   | 1.79 (1.23–2.58)    | .002           |
| Age    |                                    |                        |                                       |                        |                     |                |
| ≥65    | 7                                  | 0.98                   | 15                                    | 0.51                   | 1.90 (0.66–4.95)    | .153           |
| <65    | 37                                 | 0.55                   | 84                                    | 0.31                   | 1.77 (1.17–2.64)    | .003           |
| Sex    |                                    |                        |                                       |                        |                     |                |
| Male   | 16                                 | 0.56                   | 31                                    | 0.27                   | 2.08 (1.16–3.76)    | .023           |
| Female | 28                                 | 0.62                   | 68                                    | 0.37                   | 1.66 (1.07–2.56)    | .030           |

CI, confidence interval

**Table 3 Analyses of Risk Factors for Benign Paroxysmal Positional Vertigo in Patients with and without Depressive Disorders**

| Predictive variables               | Univariate analysis |                | Multivariate analysis |                |
|------------------------------------|---------------------|----------------|-----------------------|----------------|
|                                    | HR (95% CI)         | <i>P</i> value | HR (95% CI)           | <i>P</i> value |
| Depressive Disorders               | 1.79 (1.26–2.56)    | <.001          | 1.55 (1.08–2.23)      | .019           |
| Age ( $\geq 65 = 1$ , $< 65 = 0$ ) | 1.69 (1.07–2.66)    | .002           |                       |                |
| Sex (Female = 1, Male = 0)         | 1.29 (0.91–1.82)    | .158           |                       |                |
| Comorbidities                      |                     |                |                       |                |
| Hypertension                       | 1.91 (1.30–2.81)    | <.001          |                       |                |
| Diabetes mellitus                  | 1.36 (0.80–2.32)    | .261           |                       |                |
| Dyslipidemia                       | 2.15 (1.42–3.27)    | <.001          | 1.78 (1.15–2.75)      | .010           |
| Coronary artery disease            | 5.06 (1.87–13.67)   | <.001          | 3.29 (1.18–9.17)      | .023           |
| Hyperthyroidism                    | 2.90 (1.48–5.70)    | .002           | 2.46 (1.24–4.87)      | .010           |
| Hypothyroidism                     | 1.26 (0.18–9.02)    | .817           |                       |                |
| Cerebrovascular disease            | 3.23 (1.83–5.71)    | <.001          | 2.24 (1.21–4.15)      | .010           |
| Systemic lupus erythematosus       | 2.44 (0.90–6.60)    | .079           |                       |                |
| Degree of urbanization             |                     |                |                       |                |
| Urban                              | Reference           |                |                       |                |
| Suburban                           | 1.10 (0.77–1.57)    | .606           |                       |                |
| Rural                              | 4.38 (0.18–1.08)    | .072           |                       |                |
| Income group                       |                     |                |                       |                |
| Low income                         | Reference           |                |                       |                |
| Medium income                      | 0.98 (0.69–1.38)    | .886           |                       |                |
| High income                        | 0.65 (0.37–1.14)    | .133           |                       |                |

HR, hazard ratio; CI, confidence interval

**Table 4 Analyses of Risk Factors for Benign Paroxysmal Positional Vertigo in Patients with Depressive Disorders**

| Predictive variables               | Univariate analysis |                | Multivariate analysis |                |
|------------------------------------|---------------------|----------------|-----------------------|----------------|
|                                    | HR (95% CI)         | <i>P</i> value | HR (95% CI)           | <i>P</i> value |
| Age ( $\geq 65 = 1$ , $< 65 = 0$ ) | 1.75 (0.78–3.93)    | .174           |                       |                |
| Sex (Female = 1, Male = 0)         | 1.10 (0.60–2.04)    | .752           |                       |                |
| Comorbidities                      |                     |                |                       |                |
| Hypertension                       | 0.88 (0.41–1.90)    | .747           |                       |                |
| Diabetes mellitus                  | 0.98 (0.39–2.49)    | .969           |                       |                |
| Dyslipidemia                       | 1.97 (0.99–3.89)    | .053           |                       |                |
| Coronary artery disease            | 2.93 (0.40–21.26)   | .288           |                       |                |
| Hyperthyroidism                    | 3.74 (1.67–8.38)    | <.001          | 3.75 (1.67–8.42)      | .001           |
| Hypothyroidism                     | 2.17 (0.30–15.75)   | .444           |                       |                |
| Cerebrovascular disease            | 2.31 (0.91–5.85)    | .079           |                       |                |
| Systemic lupus                     | 3.58 (1.11–11.56)   | .033           | 3.47(1.07–11.22)      | .038           |
| Erythematosus                      |                     |                |                       |                |
| Degree of urbanization             |                     |                |                       |                |
| Urban                              | Reference           |                |                       |                |
| Suburban                           | 1.53 (0.82–2.86)    | .180           |                       |                |
| Rural                              | 0.31 (0.04–2.28)    | .249           |                       |                |
| Income group                       |                     |                |                       |                |
| Low income                         | Reference           |                |                       |                |
| Medium income                      | 1.33 (0.71–2.52)    | .377           |                       |                |
| High income                        | 1.24 (0.50–3.11)    | .644           |                       |                |

HR, hazard ratio; CI, confidence interval

1  
2  
3  
4  
5  
6  
7  
8  
9  
10  
11  
12  
13  
14  
15  
16  
17  
18  
19  
20  
21  
22  
23  
24  
25  
26  
27  
28  
29  
30  
31  
32  
33  
34  
35  
36  
37  
38  
39  
40  
41  
42  
43  
44  
45  
46  
47  
48  
49  
50  
51  
52  
53  
54  
55  
56  
57  
58  
59  
60

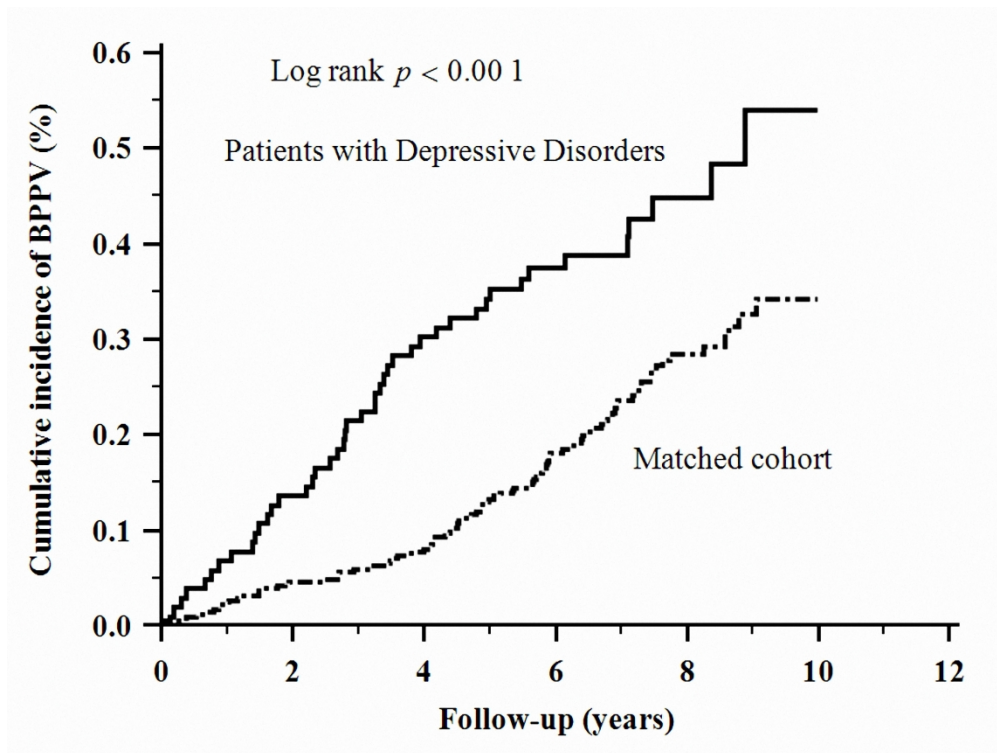

260x195mm (300 x 300 DPI)

STROBE Statement—Checklist of items that should be included in reports of *cohort studies*

|                              | Item No | Recommendation                                                                                                                                                                                                                                                                                                         | Page No |
|------------------------------|---------|------------------------------------------------------------------------------------------------------------------------------------------------------------------------------------------------------------------------------------------------------------------------------------------------------------------------|---------|
| <b>Title and abstract</b>    | 1       | (a) Indicate the study's design with a commonly used term in the title or the abstract<br>(b) Provide in the abstract an informative and balanced summary of what was done and what was found                                                                                                                          | 1       |
| <b>Introduction</b>          |         |                                                                                                                                                                                                                                                                                                                        |         |
| Background/rationale         | 2       | Explain the scientific background and rationale for the investigation being reported                                                                                                                                                                                                                                   | 5,6     |
| Objectives                   | 3       | State specific objectives, including any prespecified hypotheses                                                                                                                                                                                                                                                       | 9,10    |
| <b>Methods</b>               |         |                                                                                                                                                                                                                                                                                                                        |         |
| Study design                 | 4       | Present key elements of study design early in the paper                                                                                                                                                                                                                                                                | 9,10    |
| Setting                      | 5       | Describe the setting, locations, and relevant dates, including periods of recruitment, exposure, follow-up, and data collection                                                                                                                                                                                        | 7,8,10  |
| Participants                 | 6       | (a) Give the eligibility criteria, and the sources and methods of selection of participants. Describe methods of follow-up<br>(b) For matched studies, give matching criteria and number of exposed and unexposed                                                                                                      | 10      |
| Variables                    | 7       | Clearly define all outcomes, exposures, predictors, potential confounders, and effect modifiers. Give diagnostic criteria, if applicable                                                                                                                                                                               | 11      |
| Data sources/<br>measurement | 8*      | For each variable of interest, give sources of data and details of methods of assessment (measurement). Describe comparability of assessment methods if there is more than one group                                                                                                                                   | 7,8     |
| Bias                         | 9       | Describe any efforts to address potential sources of bias                                                                                                                                                                                                                                                              | 11      |
| Study size                   | 10      | Explain how the study size was arrived at                                                                                                                                                                                                                                                                              | 10      |
| Quantitative variables       | 11      | Explain how quantitative variables were handled in the analyses. If applicable, describe which groupings were chosen and why                                                                                                                                                                                           | 11      |
| Statistical methods          | 12      | (a) Describe all statistical methods, including those used to control for confounding<br>(b) Describe any methods used to examine subgroups and interactions<br>(c) Explain how missing data were addressed<br>(d) If applicable, explain how loss to follow-up was addressed<br>(e) Describe any sensitivity analyses | 11      |
| <b>Results</b>               |         |                                                                                                                                                                                                                                                                                                                        |         |
| Participants                 | 13*     | (a) Report numbers of individuals at each stage of study—eg numbers potentially eligible, examined for eligibility, confirmed eligible, included in the study, completing follow-up, and analysed<br>(b) Give reasons for non-participation at each stage<br>(c) Consider use of a flow diagram                        | 12      |
| Descriptive data             | 14*     | (a) Give characteristics of study participants (eg demographic, clinical, social) and information on exposures and potential confounders<br>(b) Indicate number of participants with missing data for each variable of interest<br>(c) Summarise follow-up time (eg, average and total amount)                         | 12      |
| Outcome data                 | 15*     | Report numbers of outcome events or summary measures over time                                                                                                                                                                                                                                                         | 13      |

|    |                          |    |                                                                                                                                                                                                              |    |
|----|--------------------------|----|--------------------------------------------------------------------------------------------------------------------------------------------------------------------------------------------------------------|----|
| 1  | Main results             | 16 | (a) Give unadjusted estimates and, if applicable, confounder-adjusted estimates and their precision (eg, 95% confidence interval). Make clear which confounders were adjusted for and why they were included | 13 |
| 2  |                          |    | (b) Report category boundaries when continuous variables were categorized                                                                                                                                    |    |
| 3  |                          |    | (c) If relevant, consider translating estimates of relative risk into absolute risk for a meaningful time period                                                                                             |    |
| 4  |                          |    |                                                                                                                                                                                                              |    |
| 5  |                          |    |                                                                                                                                                                                                              |    |
| 6  |                          |    |                                                                                                                                                                                                              |    |
| 7  |                          |    |                                                                                                                                                                                                              |    |
| 8  |                          |    |                                                                                                                                                                                                              |    |
| 9  | Other analyses           | 17 | Report other analyses done—eg analyses of subgroups and interactions, and sensitivity analyses                                                                                                               | 10 |
| 10 |                          |    |                                                                                                                                                                                                              |    |
| 11 | <b>Discussion</b>        |    |                                                                                                                                                                                                              |    |
| 12 |                          |    |                                                                                                                                                                                                              |    |
| 13 | Key results              | 18 | Summarise key results with reference to study objectives                                                                                                                                                     | 14 |
| 14 | Limitations              | 19 | Discuss limitations of the study, taking into account sources of potential bias or imprecision. Discuss both direction and magnitude of any potential bias                                                   | 18 |
| 15 |                          |    |                                                                                                                                                                                                              |    |
| 16 | Interpretation           | 20 | Give a cautious overall interpretation of results considering objectives, limitations, multiplicity of analyses, results from similar studies, and other relevant evidence                                   | 15 |
| 17 |                          |    |                                                                                                                                                                                                              |    |
| 18 |                          |    |                                                                                                                                                                                                              |    |
| 19 | Generalisability         | 21 | Discuss the generalisability (external validity) of the study results                                                                                                                                        | 19 |
| 20 |                          |    |                                                                                                                                                                                                              |    |
| 21 | <b>Other information</b> |    |                                                                                                                                                                                                              |    |
| 22 | Funding                  | 22 | Give the source of funding and the role of the funders for the present study and, if applicable, for the original study on which the present article is based                                                | 21 |
| 23 |                          |    |                                                                                                                                                                                                              |    |
| 24 |                          |    |                                                                                                                                                                                                              |    |

\*Give information separately for exposed and unexposed groups.

**Note:** An Explanation and Elaboration article discusses each checklist item and gives methodological background and published examples of transparent reporting. The STROBE checklist is best used in conjunction with this article (freely available on the Web sites of PLoS Medicine at <http://www.plosmedicine.org/>, Annals of Internal Medicine at <http://www.annals.org/>, and Epidemiology at <http://www.epidem.com/>). Information on the STROBE Initiative is available at <http://www.strobe-statement.org>.

# BMJ Open

## Risk of Benign Paroxysmal Positional Vertigo in Patients with Depressive Disorders: A Nationwide Population-Based Cohort Study

|                                 |                                                                                                                                                                                                                                                                                                                                                                                                                                                                                                                                                                                                                                                                                                                                                                                                                                                                                      |
|---------------------------------|--------------------------------------------------------------------------------------------------------------------------------------------------------------------------------------------------------------------------------------------------------------------------------------------------------------------------------------------------------------------------------------------------------------------------------------------------------------------------------------------------------------------------------------------------------------------------------------------------------------------------------------------------------------------------------------------------------------------------------------------------------------------------------------------------------------------------------------------------------------------------------------|
| Journal:                        | <i>BMJ Open</i>                                                                                                                                                                                                                                                                                                                                                                                                                                                                                                                                                                                                                                                                                                                                                                                                                                                                      |
| Manuscript ID                   | bmjopen-2018-026936.R2                                                                                                                                                                                                                                                                                                                                                                                                                                                                                                                                                                                                                                                                                                                                                                                                                                                               |
| Article Type:                   | Research                                                                                                                                                                                                                                                                                                                                                                                                                                                                                                                                                                                                                                                                                                                                                                                                                                                                             |
| Date Submitted by the Author:   | 18-Jan-2019                                                                                                                                                                                                                                                                                                                                                                                                                                                                                                                                                                                                                                                                                                                                                                                                                                                                          |
| Complete List of Authors:       | Hsu, Chiao-Lin; Kaohsiung Veterans General Hospital, Department of Health Management Center; Meiho University, Pingtung, Taiwan, Department of Nursing<br>Tsai, Shih-Jen; Taipei Veterans General Hospital, Department of Psychiatry; National Yang-Ming University, Taipei, Taiwan, Division of Psychiatry, Faculty of Medicine<br>Shen, Cheng-Che; Taichung Veterans General Hospital Chiayi Branch, Department of Psychiatry; National Yang-Ming University, Division of Psychiatry, Faculty of Medicine<br>Lu, Ti; Kaohsiung Veterans General Hospital, Department of Psychiatry<br>Hung, Yao-Min; Kaohsiung Veterans General Hospital, Department of Emergency Medicine; National Yang-Ming University, School of Medicine<br>Hu, Li-Yu; Taipei Veterans General Hospital, Department of Psychiatry; National Yang-Ming University, Division of Psychiatry, Faculty of Medicine |
| <b>Primary Subject Heading</b>: | Ear, nose and throat/otolaryngology                                                                                                                                                                                                                                                                                                                                                                                                                                                                                                                                                                                                                                                                                                                                                                                                                                                  |
| Secondary Subject Heading:      | Epidemiology, General practice / Family practice, Mental health, Rehabilitation medicine                                                                                                                                                                                                                                                                                                                                                                                                                                                                                                                                                                                                                                                                                                                                                                                             |
| Keywords:                       | depressive disorder, hyperthyroidism, risk factor, cohort study, systemic lupus erythematosus, benign paroxysmal positional vertigo                                                                                                                                                                                                                                                                                                                                                                                                                                                                                                                                                                                                                                                                                                                                                  |
|                                 |                                                                                                                                                                                                                                                                                                                                                                                                                                                                                                                                                                                                                                                                                                                                                                                                                                                                                      |

SCHOLARONE™  
Manuscripts

# Risk of Benign Paroxysmal Positional Vertigo in Patients with Depressive Disorders: A Nationwide Population-Based Cohort Study

Chiao-Lin Hsu<sup>1,2,3</sup>, Shih-Jen Tsai<sup>4,5</sup>, Cheng-Che Shen<sup>5,6,7</sup>, Ti Lu<sup>8</sup>, Yao-Min Hung<sup>9,10</sup>, Li-Yu

Hu<sup>4,5\*</sup>

<sup>1</sup>Center for Health Examination, Kaohsiung Veterans General Hospital, Kaohsiung, Taiwan

<sup>2</sup>Department of Nursing, Meiho University, Pingtung, Taiwan; <sup>3</sup> Center for Geriatrics and

Gerontology, Kaohsiung Veterans General Hospital Kaohsiung, Taiwan; <sup>4</sup>Department of

Psychiatry, Taipei Veterans General Hospital, Taipei; <sup>5</sup>Division of Psychiatry, Faculty of

Medicine, National Yang-Ming University, Taipei, Taiwan; <sup>6</sup>Department of information

management, National Chung-Cheng University, Chiayi, Taiwan; <sup>7</sup>Department of Psychiatry,

Chiayi branch, Taichung Veterans General Hospital, Chiayi, Taiwan; <sup>8</sup>Department of

Psychiatry, Kaohsiung Veterans General Hospital, Kaohsiung, Taiwan; <sup>9</sup>Department of

Emergency Medicine, Kaohsiung Veterans General Hospital, Kaohsiung, Taiwan; <sup>10</sup>School of

Medicine, National Yang Ming University, Taipei, Taiwan

**\*Please correspondence to Li-Yu Hu M.D.**



1  
2  
3 Postal Address: No.201, Sec. 2, Shipai Rd., Beitou District, Taipei City, Taiwan 11217,  
4

5 R.O.C  
6

7 CORRESPONDING AUTHOR'S EMAIL ADDRESS: chrishuly@gmail.com  
8

9  
10 Telephone number: +886-2-2875-7808  
11

12 **Word count: 3376**  
13  
14  
15  
16  
17  
18  
19  
20  
21  
22  
23  
24  
25  
26  
27  
28  
29  
30  
31  
32  
33  
34  
35  
36  
37  
38  
39  
40  
41  
42  
43  
44  
45  
46  
47  
48  
49  
50  
51  
52  
53  
54  
55  
56  
57  
58  
59  
60

For peer review only

## Abstract

**Objective:** The association between depression and benign paroxysmal positional vertigo (BPPV) remains debated. This study aimed to investigate the risk of BPPV in patients with depressive disorders.

**Design:** Longitudinal nationwide cohort study

**Setting:** National health insurance research database in Taiwan

**Participants:** We enrolled 10,297 patients diagnosed with depressive disorders between 2000 and 2009 and compared them to 41,188 selected control patients who had never been diagnosed with depressive disorders (at a 1:4 ratio matched by age, sex and index date) in relation to the risk of developing BPPV.

**Methods:** The follow-up period was defined as the time from the initial diagnosis of depressive disorders to the date of BPPV, censoring, or 31 December 2009. Cox proportional hazard regression analysis was used to investigate the risk of BPPV by sex, age, and comorbidities, with hazard ratios (HRs) and 95% confidence intervals (CIs).

**Results:** During the 9-year follow-up period, 44 (0.59 per 1,000 person-years) patients with depressive disorders and 99 (0.33 per 1,000 person-years) control patients were diagnosed with BPPV. The incidence rate ratio of BPPV among both cohorts calculating from events of BPPV per 1,000 person-years of observation time was 1.79 (95% CI, 1.23–2.58,  $p = .002$ ). Following adjustments for age, sex, and comorbidities, patients with depressive disorders were 1.55 times more likely to develop BPPV (95% CI, 1.08–2.23,  $p = .019$ ) as compared to control patients. In addition, hyperthyroidism (HR = 3.75, 95% CI, 1.67–8.42,  $p = .001$ ) and systemic lupus erythematosus (SLE) (HR = 3.47, 95% CI, 1.07–11.22,  $p = .038$ ) were potential risk factors for developing BPPV in patients with depressive disorders.

1  
2  
3 **Conclusions:** Patients with depressive disorders may have an increased risk of developing  
4 BPPV, especially those who have hyperthyroidism and SLE.  
5  
6

7 **Keywords:** Depressive disorders; benign paroxysmal positional vertigo; hyperthyroidism;  
8  
9 systemic lupus erythematosus; risk factor; cohort study  
10  
11

### 12 **Strengths and limitations of this study**

13

- 14
- 15 1. The incidence of benign peripheral persistent vertigo (BPPV) among depressive disorders  
16 patient remains unclear. This longitudinal population-based data was conducted to assess the  
17 risk of BPPV in patients with depressive disorders.  
18  
19
  - 20 2. The NHIRD lacks detailed clinical data regarding severity and outcomes of BPPV  
21  
22
  - 23 3. Results from our study may underestimate the current condition since only patients  
24 seeking medical service would be identified in the Registry of NHIRD.  
25  
26  
27  
28  
29  
30  
31  
32  
33  
34  
35  
36  
37  
38  
39  
40  
41  
42  
43  
44  
45  
46  
47  
48  
49  
50  
51  
52  
53  
54  
55  
56  
57  
58  
59  
60

## 1 Introduction

2 Depressive disorders are common mood disorders occurring in all populations and the  
3 Global Burden of Disease 2017 had refereed depressive disorders as a leading cause of health  
4 burden across the globe.<sup>1</sup> Patients with depressive disorders have been reported with an  
5 increased risk of mortality and propose the classification of depressive disorders as  
6 life-threatening.<sup>2,3</sup> Furthermore, people with depressive disorders have been reported with  
7 many somatic symptoms and result in increased need for clinical services, associated  
8 economic costs,<sup>4,5</sup> and considerable loss in quality of life.<sup>6</sup>

9 BPPV have been reported with a lifetime prevalence of 2.4%, is the most common type  
10 of peripheral vertigo. Which is characterized by brief spinning sensations, usually induced by  
11 a sudden change in head position with respect to gravity, with attacks generally lasting less  
12 than 1 minute. The fundamental pathophysiology of BPPV is dislodged calcium carbonate  
13 crystals in the utricle of the inner ear entering the semicircular canals.<sup>7</sup> Old age<sup>8</sup> and several  
14 co-morbidities, such as hypertension<sup>9</sup>, diabetes mellitus<sup>9</sup>, hypercholesterolemia<sup>10</sup>, pre-existing  
15 cardiovascular, thyroid and autoimmune<sup>10</sup> disease have been regarded as risk factors of BPPV.  
16 Patients who suffered from BPPV related symptoms and following economic burden have  
17 also been reported<sup>11</sup>.

18 Psychiatric disorders or emotional stress are frequently observed in patients suffering  
19 from vertigo.<sup>12,13</sup> The results of most studies have been reported the higher rate of coexistence  
20 of depression and vestibular disorders<sup>14-16</sup>. Which may lead to a vicious circle and a serious  
21 influence on the quality of life<sup>17</sup>. Peripheral vertigo may play an essential role in the  
22 pathophysiology of development of subsequent depressive disorder. However, most of these  
23 studies report contradictory or conflicting results. Furthermore, when specified to explore the  
24 association between depression and BPPV, only a relatively small-scaled case-control study

1  
2  
3 25 indicates that life stressors and related depressive disorder may be seen as a trigger of  
4  
5 26 vestibular dysfunction, that is, a potential precursor of BPPV.<sup>18</sup>  
6  
7

8 27 Therefore, considering the debates on the association between the depression and  
9  
10 28 BPPV and no large-scaled study have tried to investigate the issue, we designed a nationwide  
11  
12 29 retrospective cohort study to explore the association between depressive disorder and the  
13  
14 30 subsequent BPPV development. In addition, independent risk factors for developing BPPV  
15  
16 31 among patients with depressive disorders were also investigated.  
17  
18

## 19 32 **Materials and Methods**

### 20 33 *Data Sources*

21  
22 34 Nearly 99% of Taiwan's population utilizes health care services as a consequence of the  
23  
24 35 National Health Insurance (NHI) Program Bold Legislative Act enacted in 1995.<sup>19</sup> The  
25  
26 36 program offers comprehensive medical care coverage regarding outpatient, inpatient,  
27  
28 37 emergency visits, and Chinese medicine to all residents of Taiwan. The NHI research  
29  
30 38 database (NHIRD) contains comprehensive information with regard to clinical practice,  
31  
32 39 including prescription details and diagnostic codes in the International Classification of  
33  
34 40 Diseases, Ninth revision, Clinical Modification (ICD-9-CM) format. The NHIRD is managed  
35  
36 41 by the National Health Research Institutes (NHRI) and privacy is maintained according to  
37  
38 42 directives from the Bureau of the NHI.<sup>20</sup> The data source for our study was obtained from the  
39  
40 43 Longitudinal Health Insurance Database 2000 (LHID2000), a dataset of the NHIRD. The  
41  
42 44 LHID 2000, which contains all original claims data for 1,000,000 subjects, is a representative  
43  
44 45 database randomly selected from the 2000 Registry of Beneficiaries under the NHI program.  
45  
46 46 Which also maintains the registration data of everyone who was a beneficiary of the National  
47  
48 47 Health Insurance program during the period of 1996–2000. Moreover, the NHRI affirms that  
49  
50  
51  
52  
53  
54  
55  
56  
57  
58  
59  
60

1  
2  
3 48 there are no statistical differences in the distributions of age, sex, or health care costs between  
4  
5 49 the data in the LHID2000 and that of the NHIRD.<sup>20</sup>  
6

7  
8 50 *Availability of Data and Materials section*  
9

10 51 The NHIRD is addressed in publicity by the NHRI and the use of NHIRD is only for  
11  
12 52 research purposes. All applicants must obey the Computer-Processed Personal Data  
13  
14 53 Protection Law and relevant regulations of the Bureau of National Health Insurance and  
15  
16 54 NHRI. Moreover, applicants and their supervisor were asking for signing agreements upon  
17  
18 55 application submission. All applications are required to transmit data for review and approval  
19  
20 56 and send an e-mail to the NHRI at [nhird@nhri.org.tw](mailto:nhird@nhri.org.tw) or call at +886-037-246166 ext. 33603  
21  
22 57 for immediate service. Office Hour: Monday-Friday 8:00-17:30 (UTC+8).  
23  
24

25  
26 58 The NHIRD from the Health and Welfare Data Science Center (HWDC), Ministry of  
27  
28 59 Health and Welfare (MOHW) (<http://www.mohw.gov.tw/cht/DOS/>) is now available for the  
29  
30 60 researchers in Taiwan. The data is basically from the NHIRD. Researchers in Taiwan who  
31  
32 61 interested in the data can apply to the MOHW. In the last sentence of the paragraph on the  
33  
34 62 website, which said, "Kindly visit MOHW and NHIA on-site services for NHIRD." The  
35  
36 63 Database was delivered to a higher-level government administration, called the "Health and  
37  
38 64 Welfare Data Science Center (HWDC)" for more prompt health-related data linkage, broader  
39  
40 65 application, and better security management. Interested researchers could still apply to the  
41  
42 66 HWDC, Department of Statistics, MOHW for NHI Data at present. HWDC, MOHW website  
43  
44 67 (Chinese only currently): <http://dep.mohw.gov.tw/DOS/np-2497-113.html><sup>21</sup>  
45  
46  
47  
48  
49  
50  
51  
52  
53  
54  
55  
56  
57  
58  
59  
60

1  
2  
3 68 *Study design and subjects*  
4

5 69 We utilized data from the LHID 2000 and conducted a retrospective cohort study using a  
6  
7 70 dataset collected between January 1, 2000 and December 31, 2004. We enrolled patients  $\geq 20$   
8  
9 71 years and received at least twice diagnosis of depressive disorders by psychiatrists with  
10  
11 72 ICD-9-CM depressive disorders diagnosis codes of 296.2X-296.3X, 300.4, and 311.X. We  
12  
13 73 defined the date of enrolling an adult patient with depressive disorders as case cohort between  
14  
15 74 2000 and 2004 as enrolment date. We excluded both in depressive disorders and control  
16  
17 75 groups who were previously diagnosed with BPPV by ICD-9-CM code and A-code at the  
18  
19 76 same time (ICD-9-CM code 386.11 and A-code: A249) to exclude patients who were  
20  
21 77 diagnosed with BPPV before enrollment date.  
22  
23

24  
25 78 The A-code, a much briefer version of the ICD-9-CM codes, is another disease  
26  
27 79 classification system launched for fulfilling medical claims, was mainly used for ambulatory  
28  
29 80 care before 2000 in Taiwan. The A-code had switched to the ICD-9-CM codes by NHI  
30  
31 81 program since 2000 to perpetuate consistency between different claims records and to truly  
32  
33 82 reflect the distribution of various diseases. Consequently, we used these two medical code  
34  
35 83 systems at the same time to reduce the discrepancies during the conversion time of A-code  
36  
37 84 and ICD-9-CM codes. Which included acute myringitis, chronic myringitis, perforation of  
38  
39 85 tympanic membrane, traumatic perforation of tympanic membrane, cholesteatoma of the  
40  
41 86 middle ear, Meniere's disease, peripheral vertigo, vestibulopathy, vertigo of central origin,  
42  
43 87 labyrinthitis, presbycusis, sudden hearing loss, tinnitus, and otalgia  
44  
45  
46

47  
48 88 The cohort including patients with and without depressive disorders was observed until  
49  
50 89 the development of BPPV, death, withdrawal from the NHI system, or December 31, 2009.  
51  
52 90 The primary clinical outcome in our study was only BPPV diagnosed by neurologists or  
53  
54 91 otorhinolaryngologists. For each patient with depressive disorders included in the final cohort,  
55  
56  
57  
58  
59  
60

1  
2  
3 92 4 age- and sex-matched control patients without depressive disorders were randomly selected  
4  
5 93 on the same enrolment date from the LHID 2000. Finally, we identified 10,297 patients with  
6  
7 94 depressive disorders. To assemble a comparison cohort, we randomly selected 41,188  
8  
9 95 enrollees without a history of depressive disorders.

### 12 96 *Ethics Statement*

14 97 This study was approved by the Institutional Review Board of the Kaohsiung Veterans  
15  
16 98 General Hospital (No.: VGHKS14-CT7-07). We could not obtain written consent from study  
17  
18 99 patients as the NHI dataset consists of de-identified secondary data for research purposes. The  
19  
20 100 IRB of Kaohsiung Veterans General Hospital issued a formal written waiver for the need for  
21  
22 101 consent.

### 26 102 *Statistical analyses*

29 103 The incidence of newly diagnosed BPPV in patients with depressive disorders and  
30  
31 104 controls during the observational period was calculated and stratified by sex and age ( $\geq 65$   
32  
33 105 years or  $< 65$  years). Comparisons between continuous variables were conducted with the  
34  
35 106 independent *t*-test. Chi-squared analysis was used to examine the association of two  
36  
37 107 categorical characteristics between the depressive disorders and control cohort. A Cox  
38  
39 108 proportional hazard model was used to evaluate confounding variables and whether  
40  
41 109 depressive disorders increase the risk of developing BPPV. The confounding variables were  
42  
43 110 age, sex, and common comorbidities including hypertension, diabetes mellitus, dyslipidemia,  
44  
45 111 coronary artery disease, hyperthyroidism, hypothyroidism, cerebrovascular disease, and  
46  
47 112 systemic lupus erythematosus (SLE). Another Cox proportional-hazards regression model  
48  
49 113 was performed again to identify variables that predicted BPPV in the patients with depressive  
50  
51 114 disorders. The variables that demonstrated a moderately significant statistical relationship  
52  
53  
54  
55  
56  
57  
58  
59  
60



1  
2  
3 115 with BPPV in the univariate analysis ( $P < .1$ ) were entered through forward selection in a  
4  
5 116 multivariate analysis.

7 117 The cumulative incidences of BPPV were compared between depressive disorder and  
8  
9  
10 118 control cohorts using Kaplan–Meier curves. Stratified log rank test was applied to determine  
11  
12 119 the differences in the risk for BPPV in the cohort.

#### 14 120 *Patient and Public involvement*

16  
17 121 The data source used for this study was the claims data of Taiwan’s NHIRD. We did not  
18  
19 122 involve patients/service users in the research question, the outcome measures, or the design or  
20  
21 123 implementation of the study. There are no plans to disseminate the results of the research to  
22  
23  
24 124 study participants.

## 26 125 **Results**

### 28 126 *Participant Selection*

30  
31 127 We analyzed 10,297 patients with depressive disorders and 41,188 control patients. The  
32  
33 128 majority of patients in the cohort were female (61%). The median age was 39 years  
34  
35 129 (interquartile range [IQR], 30–51 years), and the median follow-up period was 7.19 years  
36  
37 130 (IQR = 5.96–8.48 years) for patients with depressive disorders and 7.22 years (IQR =  
38  
39 131 6.00–8.51 years) for control patients ( $p = .002$ ). Table 1 includes comparisons of demographic,  
40  
41  
42 132 clinical variables, and socioeconomic data between the control and depressive cohorts. In the  
43  
44 133 depressive disorders group, the most common comorbidities were hypertension (2,124  
45  
46 134 patients, 20.6%), diabetes mellitus (1,236 patients, 12.0%), and dyslipidemia (1,541 patients,  
47  
48 135 14.5%). As compared to the controls, depressive disorders patients had significantly more  
49  
50  
51 136 physical comorbidities. Besides, depressive disorders patients had a significantly higher  
52  
53 137 prevalence in low-income populations (50.4% vs. 44.4%,  $p < .001$ ) and in urban areas (64.1%  
54  
55 138 vs. 60.9%,  $p < .001$ ) as compared to non-depressive disorders patients.

### 139 *Person-Time Incidence Rate of BPPV*

140 During the follow-up period, 44 patients (0.59 per 1,000 person-years) were diagnosed  
141 with BPPV in the depressive disorders group, and 99 patients (0.33 per 1,000 person-years)  
142 were diagnosed with BPPV in the control group. The incidence rate ratio (IRR) of BPPV  
143 between depressive disorders and control patients was 1.79 (95% CI [confidence interval],  
144 1.23–2.58,  $p = .002$ ). The IRR of BPPV remained higher in the depressive disorders than in the  
145 control patients among both sexes. When stratified with age, only patient younger than 65  
146 years old have higher IRR of BPPV. The results are shown in Table 2.

147 The cumulative incidence of BPPV in the patients with depressive disorders was  
148 significantly higher than that in the control cohort (log-rank test,  $P < .001$ , Figure 1).

### 149 *Risks of Newly Diagnosed BPPV among the Patients with and without Depressive* 150 *Disorders*

151 After adjusting for age, sex, common comorbidities and SLE, there was a higher risk of  
152 developing BPPV in patients with depressive disorders than in the control patients (HR = 1.55,  
153 95% CI, 1.08–2.23,  $p = .019$ ). Results are summarized in Table 3.

### 154 *Risks Factors for BPPV in patients with Depressive Disorders*

155 As shown in Table 4, we predicted the development of BPPV in the depressive disorder  
156 cohorts by applying univariate analysis. Univariate analysis demonstrated that dyslipidemia  
157 (HR = 1.97, 95% CI, 0.99–3.89,  $p = .053$ ), hyperthyroidism (HR = 3.74, 95% CI, 1.67–8.38,  
158  $p < .001$ ), cerebrovascular disease (HR = 2.31, 95% CI, 0.91–5.85,  $p = .079$ ) and SLE (HR = 3.58,  
159 95% CI, 1.11–11.56,  $p = .033$ ) were possible prognostic factors. Multivariate analysis indicated  
160 that hyperthyroidism (HR = 3.75, 95% CI, 1.67–8.42,  $p = .001$ ) and SLE (HR = 3.47, 95% CI,  
161 1.07–11.22,  $p = .038$ ) were an independent risk factor for patients with depressive disorders.

### 162 **Discussion**

1  
2  
3 163 The two major findings in our study are as the following. First, patients with depressive  
4  
5 164 disorders presented a 1.55 -fold greater risk of subsequently developing BPPV than did the  
6  
7  
8 165 general population by utilizing a nationwide population-based cohort study. Secondly, only  
9  
10 166 hyperthyroidism (HR = 3.75, 95% CI, 1.67–8.42, p= .001) and SLE (HR = 3.47, 95% CI,  
11  
12 167 1.07-11.22, p= .038) were independent risk factors to develop BPPV among patients with  
13  
14 168 depressive disorders.

15  
16  
17 169 The strength of this study is using a nationwide population-based data to evaluate BPPV  
18  
19 170 risk in patients with depressive disorders. Advantages of using our NHIRD in medical  
20  
21 171 research have been previously described,<sup>22</sup> which include enormous sample size, lack of  
22  
23 172 selection and participation bias and long term comprehensive follow up. Whereas the results  
24  
25 173 of most studies demonstrated the correlation between BPPV and following depressive  
26  
27 174 disorders,<sup>23 24</sup> to the best of our knowledge, this is the first study implying that patients with  
28  
29 175 depressive disorders have higher risk of developing BPPV.

30  
31  
32  
33 176 Though depressive disorder have been reported to produce somatic symptoms including  
34  
35 177 symptoms like BPPV,<sup>25</sup> one research indicated that patients with unrecognized BPPV were  
36  
37 178 more likely to have depressive disorder.<sup>26</sup> Another study pointed out that depressive disorders  
38  
39 179 may be an early presentation of neural circuitry alterations involving connections between the  
40  
41 180 vestibular system and anatomical area such as hippocampus, amygdala, and infralimbic  
42  
43 181 cortex.<sup>27</sup> One Asian literature showed that depression symptoms may adversely affect BPPV  
44  
45 182 recurrence.<sup>28</sup> Though there was no strong evidence consistent with our findings, evidence  
46  
47 183 mentioned above may indirectly prove our hypothesis.

48  
49  
50  
51 184 The pathophysiology of depressive disorders and subsequent BPPV is unknown. There  
52  
53 185 are several proposed mechanisms to explain this association. First, dysregulation of oxidative  
54  
55 186 and inflammatory processes in depressive disorders may result in subsequent BPPV

1  
2  
3 187 development. Numerous studies have demonstrated patients with depressive disorders have  
4  
5 188 excessive oxidative stress and elevation in inflammatory responses.<sup>29-32</sup> Evidence supports a  
6  
7 189 role for oxidative stress in otolith dysfunction leading to an increased risk of developing  
8  
9  
10 190 canalolithiasis, an essential step in the pathogenesis of BPPV.<sup>33-36</sup> Additional studies conclude  
11  
12 191 depressive disorders associated with oxidative stress result in vestibular hair cells and  
13  
14 192 neuronal damage in the inner ear,<sup>37</sup> which contributes to vestibular dysfunction and  
15  
16 193 subsequent BPPV development.<sup>38 39</sup> Second, depressive disorders may induce abnormalities of  
17  
18 194 the hypothalamus-pituitary-adrenal axis, which may hinder the inner ear blood flow and  
19  
20 195 influence inner ear fluid balance. These abnormalities lead to dysfunction of the otoconial  
21  
22 196 homeostasis,<sup>18 40</sup> an established risk factor for development of BPPV.<sup>41</sup> Therefore, alterations  
23  
24 197 to the neuroendocrine system may be the link between depressive disorders and the  
25  
26 198 development of BPPV. Third, BPPV development in depressive disorders may be induced by  
27  
28 199 serotonin dysfunction. The vestibular nucleus complex is composed of a large number of  
29  
30 200 serotonin receptors, and lack of serotonin may result in a substantial impact on the  
31  
32 201 electrophysiological activity of neurons, and dysfunction of the vestibular nucleus complex.<sup>42</sup>  
33  
34 202 Previous studies have hypothesized a role for vestibular nucleus damage in the pathogenesis  
35  
36 203 of BPPV development.<sup>39 43</sup> Fourth, the dysregulation of the immune system, frequently  
37  
38 204 observed in depressive disorders,<sup>44 45</sup> has proved to be an essential part of BPPV pathogenesis.  
39  
40 205 Stone and Francis<sup>46</sup> suggest BPPV could develop by immune system's direct attack or  
41  
42 206 indirect attack, resulting in debris within the inner ears. This explanation could be confirmed  
43  
44 207 by studies demonstrated the association of several autoimmune diseases, such as systemic  
45  
46 208 sclerosis,<sup>47</sup> SLE, ulcerative colitis, Sjogren's syndrome, and rheumatoid arthritis<sup>46</sup> in the  
47  
48 209 development of BPPV. Consistent with the studies mentioned above, we found that SLE is a  
49  
50 210 risk factor for BPPV among depressive cohort (Table 4) but not for all the participants (Table  
51  
52  
53  
54  
55  
56  
57  
58  
59  
60

1  
2  
3 211 3) in this study. Based on the previous studies, several results of the studies could provide the  
4  
5 212 evidence revealing that the comorbidities with depressive disorder and SLE would result in  
6  
7 213 the exacerbation of the SLE disease activities, no matter the possible explanations were  
8  
9 214 psychological or behavioral issues such as lack of insight and poor anti-inflammatory drug  
10  
11 215 compliance.<sup>48-50</sup> The evidence indicated that the severity of inflammatory processes on the  
12  
13 216 differences between the patients with depressive disorder alone and the depressive patients  
14  
15 217 comorbid with SLE.

16  
17  
18  
19 218 We conclude patients with depressive disorders are more likely to develop BPPV if they  
20  
21 219 are afflicted with hyperthyroidism. Mechanical movements of thyroid autoantibodies in the  
22  
23 220 inner ear fluid or the development of autoimmune microangiitis in the labyrinth can result in  
24  
25 221 BPPV in the presence of hyperthyroidism or hypothyroidism.<sup>51</sup> Other studies support a role  
26  
27 222 for thyroid hormone fluctuations<sup>52</sup> and circulating anti-thyroid autoantibodies<sup>53</sup> related to  
28  
29 223 vestibular dysfunction in subsequent BPPV development. Therefore, dysregulation of the  
30  
31 224 immune system may play a vital role between hyperthyroidism and BPPV as documented by  
32  
33 225 our study. In addition, we inferred that hyperthyroidism altered calcium metabolism and  
34  
35 226 otoconia dissolve impairment may play a role in developing BPPV among depressive  
36  
37 227 disorders patients. Up to 20 percent of thyrotoxic patients have mild hypercalcemia because  
38  
39 228 of thyroid hormone-mediated bone resorption<sup>54</sup>. Otoconia, mainly synthesized from calcium<sup>55</sup>,  
40  
41 229 which breaks free and moves into the semicircular canals was the fundamental  
42  
43 230 pathophysiology of BPPV<sup>8</sup>. Therefore, hyperthyroidism with increased calcium might lead to  
44  
45 231 increased concentration of free calcium in the endolymph and reduce its capacity to dissolve  
46  
47 232 the dislodged otoconia<sup>56</sup>, this mechanism involved in the pathophysiology of BPPV.

48  
49 233 Though there is no direct evidence support the pathophysiology of BPPV occurred in  
50  
51 234 patients co-existence with depressive disorder and hyperthyroidism. Patients suffered from  
52  
53  
54  
55  
56  
57  
58  
59  
60

1  
2  
3 235 symptoms like palpitation, insomnia, anxiety, and irritability, which symptoms usually  
4  
5 236 belonging to hyperthyroidism and was difficult to discriminate from the psychiatric disorder,  
6  
7 237 have been proposed easily seeking medical treatment<sup>57</sup>. Therefore, we proposed that  
8  
9 238 hyperthyroidism related panic-like symptoms may increase the chance of diagnosis of BPPV  
10  
11 239 through greater medical contact.  
12  
13

14 240 There are several limitations in this study. The first limitation relates to the lack of  
15  
16 241 detailed information regarding tobacco use, alcohol consumption, head position in bed, and  
17  
18 242 family history of BPPV in patient data collected from the NHIRD, factors which may  
19  
20 243 influence risk of BPPV development.<sup>58-60</sup> Thus, we were unable to control for these  
21  
22 244 potentially confounding factors. Second, the NHIRD is an administrative database, which  
23  
24 245 lacks detailed clinical data regarding severity and outcomes of BPPV patients, which  
25  
26 246 interferes with analysis of BPPV prognoses in the cohort. Third, in the claims-based study  
27  
28 247 design, only patients seeking medical service would be identified in the Registry of NHIRD  
29  
30 248 and these identification issues may either overestimate or underestimate the results. Fourth,  
31  
32 249 our study did not provide any information about medications administered for BPPV.  
33  
34  
35  
36

37 250 Since profound health burden and extensive health care utilization may be influential  
38  
39 251 with BPPV development.<sup>61 62</sup> Our findings and findings in other literature raised our attention  
40  
41 252 to unrecognized BPPV and inappropriate treatment among patients with depressive disorders  
42  
43 253 may lead to disabling and related poor quality of life.  
44  
45  
46

## 47 254 **Conclusions**

48  
49 255 In the population-based retrospective study, we found that patients with depressive  
50  
51 256 disorders have statistically higher risk of developing BPPV. Furthermore, hyperthyroidism  
52  
53 257 and SLE were identified an independent risk factor to develop BPPV for patients with  
54  
55 258 depressive disorders. Future studies are required to clarify the underlying biological  
56  
57  
58  
59  
60

1  
2  
3 259 mechanisms of these associations. Clinicians are encouraged to provide appropriate medical  
4  
5 260 care for those who diagnosed with BPPV and preexisting depressive disorder. Monitoring and  
6  
7 261 management depressive symptoms for the high-risk patients are also warranted.  
8  
9

## 10 262 **List of abbreviations:**

11  
12 263 BPPV, benign paroxysmal positional vertigo; NHI, National Health Insurance; LHID  
13  
14 264 2000, Longitudinal Health Insurance Database 2000; HWDC, Health and Welfare Data  
15  
16 265 Science Center; MOHW, Ministry of Health and Welfare; NHIRD, National Health Insurance  
17  
18 266 Research Database; ICD-9-CM, the International Classification of Diseases, ninth revision,  
19  
20 267 Clinical Modification; IRRs, incidence rate ratios; HR, hazard ratio; aHR, adjusted hazard  
21  
22 268 ratio; CI, confidence interval.  
23  
24  
25

## 26 269 **Acknowledgments**

27  
28  
29 270 The authors would like to thank the Research Center of Medical informatics at  
30  
31 271 Kaohsiung Veterans General Hospital for the technical assistance. The study is based on data  
32  
33 272 from the National Health Insurance Research Database provided by the BNHI, Department of  
34  
35 273 Health, Executive Yuan, Taiwan and managed by NHRI, Taiwan. We express our particular  
36  
37 274 gratitude to the government organization BNHI and the non-profit foundation NHRI.  
38  
39  
40

## 41 275 **Author contributions**

42  
43 276 Chiao-Lin Hsu and Li-Yu, Hu wrote the manuscript. Cheng-Che Shen and Ti, Lu helped  
44  
45 277 with study design and data collection. Cheng-Che Shen, Shih-Jen Tsai and Yao-Min Hung  
46  
47 278 contributed to the revision of the manuscript. All authors read and approved the final  
48  
49 279 manuscript.  
50  
51

## 52 280 **Competing interests**

53  
54  
55 281 The authors declare that they have no conflict of interest.  
56

## 57 282 **Funding**

1  
2  
3 283 This work was supported by grant NSC 101-2314-B-075-040 from the National Science  
4  
5 284 Council, Taiwan, and grant V103C-048 from the Taipei Veterans General Hospital. The  
6  
7 285 funding sources had no role in the study design or conduct, or in the decision to submit for  
8  
9  
10 286 publication.

### 11 12 287 **Legend for Figure 1:**

13  
14  
15 288 Fig.1 Cumulative incidence of benign paroxysmal positional vertigo in depressive disorders  
16  
17 289 and comparison cohort  
18  
19 290 The cumulative incidence of benign paroxysmal positional vertigo in patients with depressive  
20  
21 291 disorders was significantly higher than that in the comparison cohort

### 22 23 24 292 **Data availability statement**

25  
26  
27 293 The data that support the findings of this study are available from the Health and Welfare  
28  
29 294 Data Science Center (HWDC), Ministry of Health and Welfare (MOHW)  
30  
31 295 (<http://www.mohw.gov.tw/cht/DOS/>) for the researchers in Taiwan. Data are available at  
32  
33 296 <http://dep.mohw.gov.tw/DOS/np-2497-113.html> (Chinese only currently) with the permission  
34  
35 297 of HWDC, Department of Statistics, MOHW.  
36  
37  
38  
39  
40  
41  
42  
43  
44  
45  
46  
47  
48  
49  
50  
51  
52  
53  
54  
55  
56  
57  
58  
59  
60



## References

1. Organization WH. Depression and Other Common Mental Disorders: Global Health Estimates. Geneva: World Health rganization. 2017:1-22.
2. Cuijpers P, Smit F. Excess mortality in depression: a meta-analysis of community studies. *Journal of affective disorders* 2002;72:227-36.
3. Kozela M, Bobak M, Besala A, et al. The association of depressive symptoms with cardiovascular and all-cause mortality in Central and Eastern Europe: Prospective results of the HAPIEE study. *European journal of preventive cardiology* 2016;23:1839-47.
4. Berto P, D'Ilario D, Ruffo P, et al. Depression: cost-of-illness studies in the international literature, a review. *The journal of mental health policy and economics* 2000;3:3-10.
5. Greenberg PE, Birnbaum HG. The economic burden of depression in the US: societal and patient perspectives. *Expert opinion on pharmacotherapy* 2005;6:369-76.
6. Jia H, Zack MM, Thompson WW, et al. Impact of depression on quality-adjusted life expectancy (QALE) directly as well as indirectly through suicide. *Social psychiatry and psychiatric epidemiology* 2015;50:939-49.
7. Fife TD, von Brevern M. Benign Paroxysmal Positional Vertigo in the Acute Care Setting. *Neurologic clinics* 2015;33:601-17.
8. Kim JS, Zee DS. Clinical practice. Benign paroxysmal positional vertigo. *N Engl J Med* 2014;370:1138-47.
9. De Stefano A, Dispenza F, Suarez H, et al. A multicenter observational study on the role of comorbidities in the recurrent episodes of benign paroxysmal positional vertigo. *Auris Nasus Larynx* 2014;41:31-6.
10. Messina A, Casani AP, Manfrin M, et al. Italian survey on benign paroxysmal positional vertigo. *Acta otorhinolaryngologica Italica : organo ufficiale della Societa italiana di otorinolaringologia e chirurgia cervico-facciale* 2017;37:328-35.
11. Benecke H, Agus S, Kuessner D, et al. The Burden and Impact of Vertigo: Findings from the REVERT Patient Registry. *Frontiers in neurology* 2013;4:136.
12. Ketola S, Havia M, Appelberg B, et al. Psychiatric symptoms in vertiginous patients. *Nord J Psychiatry* 2015;69:287-91.
13. Soderman AC, Moller J, Bagger-Sjoberg D, et al. Stress as a trigger of attacks in Meniere's disease. A case-crossover study. *The Laryngoscope* 2004;114:1843-8.
14. Monzani D, Casolari L, Guidetti G, et al. Psychological distress and disability in patients with vertigo. *Journal of psychosomatic research* 2001;50:319-23.

- 1  
2  
3 15. Chen ZJ, Chang CH, Hu LY, et al. Increased risk of benign paroxysmal positional vertigo  
4 in patients with anxiety disorders: a nationwide population-based retrospective cohort study.  
5 *BMC psychiatry* 2016;16:238.  
6  
7  
8 16. Yuan Q, Yu L, Shi D, et al. Anxiety and depression among patients with different types of  
9 vestibular peripheral vertigo. *Medicine* 2015;94:e453.  
10  
11 17. Best C, Eckhardt-Henn A, Tschan R, et al. Psychiatric morbidity and comorbidity in  
12 different vestibular vertigo syndromes. Results of a prospective longitudinal study over one  
13 year. *Journal of neurology* 2009;256:58-65.  
14  
15 18. Monzani D, Genovese E, Rovatti V, et al. Life events and benign paroxysmal positional  
16 vertigo: a case-controlled study. *Acta Otolaryngol* 2006;126:987-92.  
17  
18 19. Cheng TM. Taiwan's new national health insurance program: genesis and experience so  
19 far. *Health Aff (Millwood)* 2003;22:61-76.  
20  
21 20. NHRI CfBRo. Database. NHIR National Health Research Institutes.2018.  
22 <http://nhird.nhri.org.tw/en/2018>. (accessed 2018)  
23  
24 21. Health and Clinical Research Data Center TMU. Health and Welfare Data Science Center  
25 (HWDC) -Health and Welfare Database Taiwan. 2018.  
26 [http://hcrdc.tmu.edu.tw/en/News/Health-and-Welfare-Data-Science-Center-HWDC-Health-an](http://hcrdc.tmu.edu.tw/en/News/Health-and-Welfare-Data-Science-Center-HWDC-Health-and-Welfare-Database-88879687)  
27 [d-Welfare-Database-88879687](http://hcrdc.tmu.edu.tw/en/News/Health-and-Welfare-Data-Science-Center-HWDC-Health-and-Welfare-Database-88879687) (accessed 22, December 2018.)  
28  
29 22. Hsing AW, Ioannidis JP. Nationwide Population Science: Lessons From the Taiwan  
30 National Health Insurance Research Database. *JAMA internal medicine* 2015;175:1527-9.  
31  
32 23. Hagr A. Comorbid psychiatric conditions of benign paroxysmal positional vertigo. *Int J*  
33 *Health Sci (Qassim)* 2009;3:23-8.  
34  
35 24. Eckhardt-Henn A, Best C, Bense S, et al. Psychiatric comorbidity in different organic  
36 vertigo syndromes. *Journal of neurology* 2008;255:420-8.  
37  
38 25. Ferrari S, Monzani D, Baraldi S, et al. Vertigo "in the pink": The impact of female gender  
39 on psychiatric-psychosomatic comorbidity in benign paroxysmal positional vertigo patients.  
40 *Psychosomatics* 2014;55:280-8.  
41  
42 26. van der Zaag-Loonen HJ, van Leeuwen RB, Brintjes TD, et al. Prevalence of  
43 unrecognized benign paroxysmal positional vertigo in older patients. *European archives of*  
44 *oto-rhino-laryngology : official journal of the European Federation of*  
45 *Oto-Rhino-Laryngological Societies (EUFOS) : affiliated with the German Society for*  
46 *Oto-Rhino-Laryngology - Head and Neck Surgery* 2015;272:1521-4.  
47  
48 27. Gurvich C, Maller JJ, Lithgow B, et al. Vestibular insights into cognition and psychiatry.  
49 *Brain research* 2013;1537:244-59.  
50  
51  
52  
53  
54  
55  
56  
57  
58  
59  
60

- 1  
2  
3 28. Wei W, Sayyid ZN, Ma X, et al. Presence of Anxiety and Depression Symptoms Affects  
4 the First Time Treatment Efficacy and Recurrence of Benign Paroxysmal Positional Vertigo.  
5 *Frontiers in neurology* 2018;9:178.  
6  
7  
8 29. Sarandol A, Sarandol E, Eker SS, et al. Major depressive disorder is accompanied with  
9 oxidative stress: short-term antidepressant treatment does not alter oxidative-antioxidative  
10 systems. *Human psychopharmacology* 2007;22:67-73.  
11  
12 30. Cudney LE, Sassi RB, Behr GA, et al. Alterations in circadian rhythms are associated  
13 with increased lipid peroxidation in females with bipolar disorder. *The international journal*  
14 *of neuropsychopharmacology / official scientific journal of the Collegium Internationale*  
15 *Neuropsychopharmacologicum (CINP)* 2014;17:715-22.  
16  
17  
18 31. Szuster-Ciesielska A, Slotwinska M, Stachura A, et al. Accelerated apoptosis of blood  
19 leukocytes and oxidative stress in blood of patients with major depression. *Progress in*  
20 *neuro-psychopharmacology & biological psychiatry* 2008;32:686-94.  
21  
22  
23 32. Widner B, Fuchs D, Leblhuber F, et al. Does disturbed homocysteine and folate  
24 metabolism in depression result from enhanced oxidative stress? *Journal of neurology,*  
25 *neurosurgery, and psychiatry* 2001;70:419.  
26  
27  
28 33. Tsai KL, Cheng YY, Leu HB, et al. Investigating the role of Sirt1-modulated oxidative  
29 stress in relation to benign paroxysmal positional vertigo and Parkinson's disease.  
30 *Neurobiology of aging* 2015;36:2607-16.  
31  
32  
33 34. Kaya H, Gokdemir MT, Sogut O, et al. Evaluation of oxidative status and trace elements  
34 in patients with benign paroxysmal positional vertigo. *HealthMed* 2013;7:72-9.  
35  
36  
37 35. Goto F, Hayashi K, Kunihiro T, et al. The possible contribution of angiitis to the onset of  
38 benign paroxysmal positional vertigo (BPPV). *The international tinnitus journal*  
39 2010;16:25-8.  
40  
41  
42 36. Fujita N, Yamanaka T, Okamoto H, et al. Horizontal canal benign paroxysmal positional  
43 vertigo--its affected side and horizontal semicircular canal function. *Nihon Jibiinkoka Gakkai*  
44 *kaiho* 2005;108:202-6.  
45  
46  
47 37. Iwasaki S, Yamasoba T. Dizziness and Imbalance in the Elderly: Age-related Decline in  
48 the Vestibular System. *Aging Dis* 2015;6:38-47.  
49  
50  
51 38. Xu Z, Zhao P, Yang X, et al. The hearing and vestibular evoked myogenic potentials test  
52 in patients with primary benign paroxysmal positional vertigo. *Lin chuang er bi yan hou tou*  
53 *jing wai ke za zhi = Journal of clinical otorhinolaryngology, head, and neck surgery*  
54 2015;29:20-3.  
55  
56  
57 39. Frohman EM, Kramer PD, Dewey RB, et al. Benign paroxysmal positioning vertigo in  
58 multiple sclerosis: diagnosis, pathophysiology and therapeutic techniques. *Multiple sclerosis*  
59 *(Houndmills, Basingstoke, England)* 2003;9:250-5.  
60

- 1  
2  
3 40. Horner KC, Cazals Y. Stress in hearing and balance in Meniere's disease. *Noise & health*  
4 2003;5:29-34.  
5  
6  
7 41. Fuchs E, Flugge G. Chronic social stress: effects on limbic brain structures. *Physiol Behav*  
8 2003;79:417-27.  
9  
10 42. Smith PF, Darlington CL. A possible explanation for dizziness following SSRI  
11 discontinuation. *Acta Otolaryngol* 2010;130:981-3.  
12  
13 43. Fetter M. Vestibulo-ocular reflex. *Developments in ophthalmology* 2007;40:35-51.  
14  
15 44. ChiriTa AL, Gheorman V, Bondari D, et al. Current understanding of the neurobiology of  
16 major depressive disorder. *Romanian journal of morphology and embryology = Revue*  
17 *roumaine de morphologie et embryologie* 2015;56:651-8.  
18  
19 45. Hodes GE, Kana V, Menard C. Neuroimmune mechanisms of depression.  
20 2015;18:1386-93.  
21  
22 46. Stone JH, Francis HW. Immune-mediated inner ear disease. *Current opinion in*  
23 *rheumatology* 2000;12:32-40.  
24  
25 47. Thombs BD, Jewett LR, Kwakkenbos L, et al. Major depression diagnoses among patients  
26 with systemic sclerosis: baseline and one-month followup. *Arthritis care & research*  
27 2015;67:411-6.  
28  
29 48. Alsowaida N, Alrasheed M, Mayet A, et al. Medication adherence, depression and disease  
30 activity among patients with systemic lupus erythematosus. *Lupus* 2018;27:327-32.  
31  
32 49. Heiman E, Lim SS, Bao G, et al. Depressive Symptoms Are Associated With Low  
33 Treatment Adherence in African American Individuals With Systemic Lupus Erythematosus.  
34 *Journal of clinical rheumatology : practical reports on rheumatic & musculoskeletal diseases*  
35 2018;24:368-74.  
36  
37 50. Figueiredo-Braga M, Cornaby C, Cortez A, et al. Depression and anxiety in systemic  
38 lupus erythematosus: The crosstalk between immunological, clinical, and psychosocial  
39 factors. *Medicine* 2018;97:e11376.  
40  
41 51. Papi G, Guidetti G, Corsello SM, et al. The association between benign paroxysmal  
42 positional vertigo and autoimmune chronic thyroiditis is not related to thyroid status. *Thyroid*  
43 2010;20:237-8.  
44  
45 52. Lautermann J, ten Cate W-JF. Postnatal expression of the  $\alpha$ -thyroid hormone receptor in  
46 the rat cochlea. *Hearing Research* 1997;107:23-8.  
47  
48 53. Chiarella G, Tognini S, Nacci A, et al. Vestibular disorders in euthyroid patients with  
49 Hashimoto's thyroiditis: role of thyroid autoimmunity. *Clinical endocrinology* 2014;81:600-5.  
50  
51  
52  
53  
54  
55  
56  
57  
58  
59  
60

- 1  
2  
3 54. Iqbal AA, Burgess EH, Gallina DL, et al. Hypercalcemia in hyperthyroidism: patterns of  
4 serum calcium, parathyroid hormone, and 1,25-dihydroxyvitamin D3 levels during  
5 management of thyrotoxicosis. *Endocrine practice : official journal of the American College*  
6 *of Endocrinology and the American Association of Clinical Endocrinologists* 2003;9:517-21.  
7  
8  
9 55. Lundberg YW, Xu Y, Thiessen KD, et al. Mechanisms of otoconia and otolith  
10 development. *Developmental dynamics : an official publication of the American Association*  
11 *of Anatomists* 2015;244:239-53.  
12  
13 56. Vibert D, Kompis M, Hausler R. Benign paroxysmal positional vertigo in older women  
14 may be related to osteoporosis and osteopenia. *The Annals of otology, rhinology, and*  
15 *laryngology* 2003;112:885-9.  
16  
17 57. Demet MM, Ozmen B, Deveci A, et al. Depression and anxiety in hyperthyroidism. *Arch*  
18 *Med Res* 2002;33:552-6.  
19  
20 58. Sunami K, Tochino R, Tokuhara Y, et al. Effects of cigarettes and alcohol consumption in  
21 benign paroxysmal positioning vertigo. *Acta Otolaryngol* 2006;126:834-8.  
22  
23 59. Lopez-Escamez JA, Gamiz MJ, Finana MG, et al. Position in bed is associated with left or  
24 right location in benign paroxysmal positional vertigo of the posterior semicircular canal.  
25 *American journal of otolaryngology* 2002;23:263-6.  
26  
27 60. Gizzi M, Ayyagari S, Khattar V. The familial incidence of benign paroxysmal positional  
28 vertigo. *Acta Otolaryngol* 1998;118:774-7.  
29  
30 61. Grill E, Penger M, Kentala E. Health care utilization, prognosis and outcomes of  
31 vestibular disease in primary care settings: systematic review. *Journal of neurology* 2016;263  
32 Suppl 1:S36-44.  
33  
34 62. Mueller M, Strobl R, Jahn K, et al. Burden of disability attributable to vertigo and  
35 dizziness in the aged: results from the KORA-Age study. *European journal of public health*  
36 2014;24:802-7.  
37  
38  
39  
40  
41  
42  
43  
44  
45  
46  
47  
48  
49  
50  
51  
52  
53  
54  
55  
56  
57  
58  
59  
60

**Table 1 Baseline Characteristics of Patients with and without Depressive Disorders**

| Demographic data             | Patients with Depressive Disorders |      | Patients without Depressive Disorders |      | <i>P</i> value |
|------------------------------|------------------------------------|------|---------------------------------------|------|----------------|
|                              | <i>n</i> = 10,297                  |      | <i>n</i> = 41,188                     |      |                |
|                              | <i>n</i>                           | %    | <i>n</i>                              | %    |                |
| Age (years) <sup>a</sup>     | 39 (30–51)                         |      | 39 (30–51)                            |      |                |
| ≥65                          | 1,036                              | 10.1 | 4,143                                 | 10.1 | .999           |
| <65                          | 9,261                              | 89.9 | 37,045                                | 89.9 |                |
| Sex                          |                                    |      |                                       |      |                |
| Male                         | 4,012                              | 39.0 | 16,048                                | 39.0 | 1.000          |
| Female                       | 6,285                              | 61.0 | 25,140                                | 61.0 |                |
| Comorbidities                |                                    |      |                                       |      |                |
| Hypertension                 | 2,124                              | 20.6 | 5,444                                 | 13.2 | <.001          |
| Diabetes mellitus            | 1,236                              | 12.0 | 3,112                                 | 7.5  | <.001          |
| Dyslipidemia                 | 1,541                              | 14.5 | 3,829                                 | 9.3  | <.001          |
| Coronary artery disease      | 87                                 | 0.8  | 235                                   | 0.6  | .002           |
| Hyperthyroidism              | 511                                | 5.0  | 727                                   | 1.8  | <.001          |
| Hypothyroidism               | 116                                | 1.1  | 193                                   | 0.5  | <.001          |
| Cerebrovascular disease      | 573                                | 5.6  | 1,106                                 | 2.7  | <.001          |
| Systemic lupus erythematosus | 216                                | 2.1  | 437                                   | 1.1  | <.001          |
| Degree of urbanization       |                                    |      |                                       |      |                |
| Urban                        | 6,599                              | 64.1 | 25,196                                | 60.9 | <.001          |
| Suburban                     | 2,680                              | 26.0 | 12,172                                | 29.4 |                |
| Rural                        | 817                                | 7.9  | 3,205                                 | 7.8  |                |
| Income group                 |                                    |      |                                       |      |                |
| Low income                   | 5,189                              | 50.4 | 18,340                                | 44.4 | <.001          |
| Medium income                | 3,819                              | 37.1 | 16,426                                | 39.7 |                |

|   |                              |                  |      |                  |      |
|---|------------------------------|------------------|------|------------------|------|
| 1 |                              |                  |      |                  |      |
| 2 |                              |                  |      |                  |      |
| 3 | High income                  | 1,289            | 12.5 | 6,422            | 15.5 |
| 4 |                              |                  |      |                  |      |
| 5 | Follow-up years <sup>a</sup> | 7.19 (5.96–8.48) |      | 7.22 (6.00–8.51) | .002 |
| 6 | <hr/>                        |                  |      |                  |      |

<sup>a</sup>Median (interquartile range)

For peer review only

**Table 2 Person-Time Incidence of Benign Paroxysmal Positional Vertigo (BPPV) in Patients with and without Depressive Disorders**

|        | Patients with Depressive Disorders |                        | Patients without Depressive Disorders |                        | Rate ratio (95% CI) | <i>P</i> value |
|--------|------------------------------------|------------------------|---------------------------------------|------------------------|---------------------|----------------|
|        | No. of BPPV                        | Per 1,000 person-years | No. of BPPV                           | Per 1,000 person-years |                     |                |
| Total  | 44                                 | 0.59                   | 99                                    | 0.33                   | 1.79 (1.23–2.58)    | .002           |
| Age    |                                    |                        |                                       |                        |                     |                |
| ≥65    | 7                                  | 0.98                   | 15                                    | 0.51                   | 1.90 (0.66–4.95)    | .153           |
| <65    | 37                                 | 0.55                   | 84                                    | 0.31                   | 1.77 (1.17–2.64)    | .003           |
| Sex    |                                    |                        |                                       |                        |                     |                |
| Male   | 16                                 | 0.56                   | 31                                    | 0.27                   | 2.08 (1.16–3.76)    | .023           |
| Female | 28                                 | 0.62                   | 68                                    | 0.37                   | 1.66 (1.07–2.56)    | .030           |

CI, confidence interval



**Table 3 Analyses of Risk Factors for Benign Paroxysmal Positional Vertigo in Patients with and without Depressive Disorders**

| Predictive variables              | Univariate analysis |                | Multivariate analysis |                |
|-----------------------------------|---------------------|----------------|-----------------------|----------------|
|                                   | HR (95% CI)         | <i>P</i> value | HR (95% CI)           | <i>P</i> value |
| Depressive Disorders              | 1.79 (1.26–2.56)    | <.001          | 1.55 (1.08–2.23)      | .019           |
| Age ( $\geq 65 = 1$ , $<65 = 0$ ) | 1.69 (1.07–2.66)    | .002           |                       |                |
| Sex (Female = 1, Male = 0)        | 1.29 (0.91–1.82)    | .158           |                       |                |
| Comorbidities                     |                     |                |                       |                |
| Hypertension                      | 1.91 (1.30–2.81)    | <.001          |                       |                |
| Diabetes mellitus                 | 1.36 (0.80–2.32)    | .261           |                       |                |
| Dyslipidemia                      | 2.15 (1.42–3.27)    | <.001          | 1.78 (1.15–2.75)      | .010           |
| Coronary artery disease           | 5.06 (1.87–13.67)   | <.001          | 3.29 (1.18–9.17)      | .023           |
| Hyperthyroidism                   | 2.90 (1.48–5.70)    | .002           | 2.46 (1.24–4.87)      | .010           |
| Hypothyroidism                    | 1.26 (0.18–9.02)    | .817           |                       |                |
| Cerebrovascular disease           | 3.23 (1.83–5.71)    | <.001          | 2.24 (1.21–4.15)      | .010           |
| Systemic lupus erythematosus      | 2.44 (0.90–6.60)    | .079           |                       |                |
| Degree of urbanization            |                     |                |                       |                |
| Urban                             | Reference           |                |                       |                |
| Suburban                          | 1.10 (0.77–1.57)    | .606           |                       |                |
| Rural                             | 4.38 (0.18–1.08)    | .072           |                       |                |
| Income group                      |                     |                |                       |                |
| Low income                        | Reference           |                |                       |                |
| Medium income                     | 0.98 (0.69–1.38)    | .886           |                       |                |
| High income                       | 0.65 (0.37–1.14)    | .133           |                       |                |

HR, hazard ratio; CI, confidence interval

**Table 4 Analyses of Risk Factors for Benign Paroxysmal Positional Vertigo in Patients with Depressive Disorders**

| Predictive variables               | Univariate analysis |                | Multivariate analysis |                |
|------------------------------------|---------------------|----------------|-----------------------|----------------|
|                                    | HR (95% CI)         | <i>P</i> value | HR (95% CI)           | <i>P</i> value |
| Age ( $\geq 65 = 1$ , $< 65 = 0$ ) | 1.75 (0.78–3.93)    | .174           |                       |                |
| Sex (Female = 1, Male = 0)         | 1.10 (0.60–2.04)    | .752           |                       |                |
| Comorbidities                      |                     |                |                       |                |
| Hypertension                       | 0.88 (0.41–1.90)    | .747           |                       |                |
| Diabetes mellitus                  | 0.98 (0.39–2.49)    | .969           |                       |                |
| Dyslipidemia                       | 1.97 (0.99–3.89)    | .053           |                       |                |
| Coronary artery disease            | 2.93 (0.40–21.26)   | .288           |                       |                |
| Hyperthyroidism                    | 3.74 (1.67–8.38)    | <.001          | 3.75 (1.67–8.42)      | .001           |
| Hypothyroidism                     | 2.17 (0.30–15.75)   | .444           |                       |                |
| Cerebrovascular disease            | 2.31 (0.91–5.85)    | .079           |                       |                |
| Systemic lupus                     | 3.58 (1.11–11.56)   | .033           | 3.47(1.07–11.22)      | .038           |
| Erythematosus                      |                     |                |                       |                |
| Degree of urbanization             |                     |                |                       |                |
| Urban                              | Reference           |                |                       |                |
| Suburban                           | 1.53 (0.82–2.86)    | .180           |                       |                |
| Rural                              | 0.31 (0.04–2.28)    | .249           |                       |                |
| Income group                       |                     |                |                       |                |
| Low income                         | Reference           |                |                       |                |
| Medium income                      | 1.33 (0.71–2.52)    | .377           |                       |                |
| High income                        | 1.24 (0.50–3.11)    | .644           |                       |                |

HR, hazard ratio; CI, confidence interval

1  
2  
3  
4  
5  
6  
7  
8  
9  
10  
11  
12  
13  
14  
15  
16  
17  
18  
19  
20  
21  
22  
23  
24  
25  
26  
27  
28  
29  
30  
31  
32  
33  
34  
35  
36  
37  
38  
39  
40  
41  
42  
43  
44  
45  
46  
47  
48  
49  
50  
51  
52  
53  
54  
55  
56  
57  
58  
59  
60



260x195mm (300 x 300 DPI)
